# Supplementary material for: DABCO-mediated [3+3] cycloaddition of azomethine imines with in situ generated nitrile oxides from hydroximoyl chlorides
Source: Royal Society of Chemistry journal article supplement (doi:10.1039/c9cc05367k), 2019-01-01
Supplement: c9cc05367k1.pdf [file c9cc05367k1.pdf]

# Electronic Supplementary Information

## DABCO-mediated [3+3] cycloaddition of azomethine imines with *in situ* generated nitrile oxides from hydroximoyl chlorides

Qing-Yun Fang, ‡<sup>a</sup> Hai-Shan Jin, ‡<sup>a</sup> Ru-Bing Wang,<sup>\*b</sup> and Li-Ming Zhao<sup>\*ab</sup>

<sup>a</sup> School of Chemistry and Materials Science, Jiangsu Normal University, Xuzhou 221116,

Jiangsu, China

<sup>b</sup> State Key Laboratory of Bioactive Substance and Function of Natural Medicines, Institute of

Materia Medica, Chinese Academy of Medical Sciences and Peking Union Medical College,

Beijing 100050, China

## Table of Contents

|                                                                                           |         |
|-------------------------------------------------------------------------------------------|---------|
| 1. General methods .....                                                                  | S2      |
| 2. General procedure for the synthesis of product <b>3</b> and characterization data..... | S2-S11  |
| 3. Procedure for the synthesis of compound <b>4</b> and characterization data.....        | S11     |
| 4. Copies of <sup>1</sup> H and <sup>13</sup> C NMR spectra for product <b>3</b> .....    | S13-S39 |
| 5. Copies of <sup>1</sup> H and <sup>13</sup> C NMR spectra for compound <b>4</b> .....   | S40     |
| 6. Crystal structure of compound <b>3I</b> .....                                          | S41-S42 |

**General methods** Solvents were treated prior to use according to the standard methods. Other reagents were used as purchased without further purification. Reaction progress was monitored by thin-layer chromatography (TLC) on silica gel plates. Chromatographic purification was performed on silica gel columns (200-300 mesh size). Melting points were uncorrected. <sup>1</sup>H NMR and <sup>13</sup>C NMR spectra were recorded at 400 MHz and 100 MHz in CDCl<sub>3</sub> with chemical shift (δ) given in ppm relative to TMS as internal standard. Multiplicities were indicated, s (singlet), d (doublet), t (triplet), m (multiplet), dd (doublet of doublets), etc; coupling constant (*J*) were given in Hertz (Hz). High resolution mass spectra (HRMS) were recorded using electrospray ionization (ESI) and time-of-flight (TOF) mass analysis. The azomethine imines **1** and hydroximoyl chlorides **2** were prepared following the literature procedures.<sup>1,2</sup>

**General procedure for the synthesis of product 3.** To a solution of hydroximoyl chloride **2** (0.1 mmol) in chloroform (2.0 mL) was added DABCO (0.3 mmol) and azomethine imines **1** (0.15 mmol). The reaction mixture was stirred at 50 °C for 10 h. Upon completion of the reaction, water (5 mL) was added and the mixture was extracted with DCM (3 × 5 mL). The combined organic layers were dried and concentrated under reduced pressure followed by silica gel column chromatography purification (petroleum ether/ethyl acetate = 5:1-3:1) to afford the product **3**.

1,4-Diphenyl-7,8-dihydro-1H,6H-pyrazolo[1,2-d] [1,2,4,5] oxatriazin-6-one (**3a**). White solid (20 mg, 68% yield); mp 164-166 °C. <sup>1</sup>H NMR (400 MHz, CDCl<sub>3</sub>) δ 7.60-7.57 (m, 2H), 7.56-7.53 (m, 2H), 7.52-7.44 (m, 4H), 7.46-7.41 (m, 2H), 5.04 (s, 1H), 3.41 (ddd, *J* = 8.8, 5.2, 2.0

Hz, 1H), 2.98 (dt,  $J = 10.8, 9.2$  Hz, 1H), 2.76-2.67 (m, 1H), 2.53 (ddd,  $J = 14.4, 8.8, 5.2$  Hz, 1H).  $^{13}\text{C}$  NMR (100 MHz,  $\text{CDCl}_3$ )  $\delta$  168.2, 145.4, 132.9, 130.8, 130.4, 129.3, 129.0, 128.8, 128.6, 128.0, 95.1, 45.7, 29.6. HRMS (ESI)  $m/z$  calcd for  $\text{C}_{17}\text{H}_{16}\text{N}_3\text{O}_2$   $[\text{M} + \text{H}]^+$  294.1243; found 294.1262.

1-Phenyl-4-(*o*-tolyl)-7,8-dihydro-1H,6H-pyrazolo[1,2-*d*][1,2,4,5]oxatriazin-6-one (**3b**). White solid (18 mg, 57% yield); mp 179-180 °C.  $^1\text{H}$  NMR (400 MHz,  $\text{CDCl}_3$ )  $\delta$  7.58-7.55 (m, 2H), 7.50-7.40 (m, 5H), 7.28 (d,  $J = 8.0$  Hz, 2H), 5.00 (s, 1H), 3.41 (ddd,  $J = 10.8, 8.8, 5.2$  Hz, 1H), 2.98 (dt,  $J = 10.8, 9.2$  Hz, 1H), 2.74-2.67 (m, 1H), 2.51 (ddd,  $J = 14.4, 8.8, 5.2$  Hz, 1H), 2.41 (s, 3H).  $^{13}\text{C}$  NMR (100 MHz,  $\text{CDCl}_3$ )  $\delta$  168.2, 145.3, 141.0, 130.4, 130.0, 129.7, 129.3, 128.7, 128.6, 128.0, 95.1, 45.7, 29.7, 21.4. HRMS (ESI)  $m/z$  calcd for  $\text{C}_{18}\text{H}_{18}\text{N}_3\text{O}_2$   $[\text{M} + \text{H}]^+$  308.1399; found 308.1403.

1-Phenyl-4-(*m*-tolyl)-7,8-dihydro-1H,6H-pyrazolo[1,2-*d*][1,2,4,5]oxatriazin-6-one (**3c**). White solid (22 mg, 72% yield); mp 180-181 °C.  $^1\text{H}$  NMR (400 MHz,  $\text{CDCl}_3$ )  $\delta$  7.54-7.45 (m, 6H), 7.41-7.28 (m, 3H), 5.03 (s, 1H), 3.41 (ddd,  $J = 11.2, 9.2, 5.6$  Hz, 1H), 2.98 (dt,  $J = 10.8, 9.2$  Hz, 1H), 2.75-2.66 (m, 1H), 2.52 (ddd,  $J = 14.0, 8.8, 5.2$  Hz, 1H), 2.39 (s, 3H).  $^{13}\text{C}$  NMR (100 MHz,  $\text{CDCl}_3$ )  $\delta$  168.2, 145.3, 141.0, 130.4, 130.0, 129.7, 129.3, 128.7, 128.6, 128.0, 95.1, 45.7, 29.7, 21.4. HRMS (ESI)  $m/z$  calcd for  $\text{C}_{18}\text{H}_{18}\text{N}_3\text{O}_2$   $[\text{M} + \text{H}]^+$  308.1399; found 308.1416.

1-Phenyl-4-(*p*-tolyl)-7,8-dihydro-1H,6H-pyrazolo[1,2-*d*][1,2,4,5]oxatriazin-6-one (**3d**). White solid (24 mg, 78% yield); mp 181-182 °C.  $^1\text{H}$  NMR (400 MHz,  $\text{CDCl}_3$ )  $\delta$  7.54-7.45 (m, 7H), 7.24 (d,  $J = 8.0$  Hz, 2H), 5.02 (s, 1H), 3.39 (ddd,  $J = 10.8, 9.2, 5.2$  Hz, 1H), 2.97 (dt,  $J = 10.8, 9.2$  Hz, 1H), 2.73-2.65 (m, 1H), 2.51 (ddd,  $J = 14.4, 8.8, 5.6$  Hz, 1H), 2.40 (s, 3H).  $^{13}\text{C}$  NMR

(100 MHz, CDCl<sub>3</sub>) δ 168.3, 145.4, 140.6, 133.0, 130.8, 129.0, 128.8, 128.8, 128.4, 126.3, 95.1, 45.6, 29.7, 21.5. HRMS (ESI) m/z calcd for C<sub>18</sub>H<sub>17</sub>N<sub>3</sub>NaO<sub>2</sub> [M + Na]<sup>+</sup> 330.1218; found 330.1242.

4-(4-Methoxyphenyl)-1-phenyl-7,8-dihydro-1H,6H-pyrazolo[1,2-d][1,2,4,5]oxatriazin-6-one (**3e**). White solid (27 mg, 82% yield); mp 171-172 °C. <sup>1</sup>H NMR (400 MHz, CDCl<sub>3</sub>) δ 7.53-7.44 (m, 7H), 6.97-6.92 (m, 2H), 5.03 (s, 1H), 3.84 (s, 3H), 3.45-3.37 (m, 1H), 3.03-2.95 (m, 1H), 2.73-2.64 (m, 1H), 2.57-2.48 (m, 1H). <sup>13</sup>C NMR (100 MHz, CDCl<sub>3</sub>) δ 168.6, 161.4, 145.1, 133.1, 132.9, 130.9, 130.8, 130.4, 130.0, 129.0, 129.0, 128.8, 121.5, 113.5, 95.0, 55.3, 45.4, 29.6. HRMS (ESI) m/z calcd for C<sub>18</sub>H<sub>18</sub>N<sub>3</sub>O<sub>3</sub> [M + H]<sup>+</sup> 324.1348; found 324.1360.

4-(4-(Methylthio)phenyl)-1-phenyl-7,8-dihydro-1H,6H-pyrazolo[1,2-d][1,2,4,5]oxatriazin-6-one (**3f**). (26 mg, 76% yield); mp 175-176 °C. <sup>1</sup>H NMR (400 MHz, CDCl<sub>3</sub>) δ 7.56 (d, *J* = 8.4 Hz, 2H), 7.50-7.40 (m, 5H), 7.33 (d, *J* = 8.4 Hz, 2H), 4.99 (s, 1H), 3.45-3.37 (m, 1H), 3.41 (ddd, *J* = 10.8, 9.2, 5.2 Hz, 1H), 3.03-2.93 (m, 1H), 2.75-2.66 (m, 1H), 2.54-2.48 (m, 1H), 2.53 (s, 3H). <sup>13</sup>C NMR (100 MHz, CDCl<sub>3</sub>) δ 168.1, 145.3, 142.3, 130.4, 129.2, 129.1, 128.6, 128.0, 126.3, 94.8, 45.7, 29.6, 15.3. HRMS (ESI) m/z calcd for C<sub>18</sub>H<sub>18</sub>N<sub>3</sub>O<sub>2</sub>S [M + H]<sup>+</sup> 340.1120; found 340.1116.

4-([1,1'-Biphenyl]-4-yl)-1-phenyl-7,8-dihydro-1H,6H-pyrazolo[1,2-d][1,2,4,5]oxatriazin-6-one (**3g**). White solid (21 mg, 57% yield); mp 174-175 °C. <sup>1</sup>H NMR (400 MHz, CDCl<sub>3</sub>) δ 7.66-7.61 (m, 6H), 7.56-7.43 (m, 7H), 7.38 (t, *J* = 7.2 Hz, 1H), 5.07 (s, 1H), 3.44 (ddd, *J* = 10.8, 9.2, 5.6 Hz, 1H), 3.02 (dt, *J* = 11.2, 8.8 Hz, 1H), 2.77-2.68 (m, 1H), 2.55 (ddd, *J* = 14.8, 9.2, 6.4 Hz, 1H). <sup>13</sup>C NMR (100 MHz, CDCl<sub>3</sub>) δ 168.5, 145.2, 143.2, 140.4, 133.0, 130.8, 129.0, 129.0, 128.8, 128.8, 128.1, 127.7, 127.3, 126.8, 95.1, 45.6, 29.6. HRMS (ESI) m/z

calcd for  $C_{23}H_{19}N_3NaO_2$   $[M + Na]^+$  392.1375; found 392.1398.

4-(4-Bromophenyl)-1-phenyl-7,8-dihydro-1H,6H-pyrazolo[1,2-d][1,2,4,5]oxatriazin-6-one

(3h). White solid (29 mg, 79% yield); mp 191-193 °C.  $^1H$  NMR (400 MHz,  $CDCl_3$ )  $\delta$  7.57-7.43 (m, 9H), 5.01 (s, 1H), 3.41 (ddd,  $J = 11.2, 9.2, 5.6$  Hz, 1H), 2.99 (dt,  $J = 11.2, 8.8$  Hz, 1H), 2.73-2.65 (m, 1H), 2.52 (ddd,  $J = 14.8, 8.8, 5.6$  Hz, 1H).  $^{13}C$  NMR (100 MHz,  $CDCl_3$ )  $\delta$  168.6, 144.5, 132.7, 131.3, 131.0, 130.1, 129.1, 128.8, 128.2, 125.0, 95.1, 45.6, 29.5. HRMS (ESI)  $m/z$  calcd for  $C_{17}H_{15}BrN_3O_2$   $[M + H]^+$  372.0348; found 372.0378.

4-(3-Bromophenyl)-1-phenyl-7,8-dihydro-1H,6H-pyrazolo[1,2-d][1,2,4,5]oxatriazin-6-one

(3i). White solid (30 mg, 80% yield); mp 192-194 °C.  $^1H$  NMR (400 MHz,  $CDCl_3$ )  $\delta$  7.73 (t,  $J = 2.0$  Hz, 1H), 7.59 (d,  $J = 8.0$  Hz, 1H), 7.53-7.45 (m, 6H), 7.30 (t,  $J = 7.6$  Hz, 1H), 5.01 (s, 1H), 3.41 (ddd,  $J = 10.8, 8.8, 5.6$  Hz, 1H), 2.99 (dt,  $J = 10.8, 9.2$  Hz, 1H), 2.74-2.65 (m, 1H), 2.52 (ddd,  $J = 14.4, 8.8, 5.6$  Hz, 1H).  $^{13}C$  NMR (100 MHz,  $CDCl_3$ )  $\delta$  168.4, 144.1, 133.4, 132.6, 131.5, 131.2, 131.0, 129.5, 129.1, 128.8, 127.2, 122.0, 95.1, 45.7, 29.5. HRMS (ESI)  $m/z$  calcd for  $C_{17}H_{14}BrN_3NaO_2$   $[M + Na]^+$  394.0167; found 394.0185.

4-(3-Chlorophenyl)-1-phenyl-7,8-dihydro-1H,6H-pyrazolo[1,2-d][1,2,4,5]oxatriazin-6-one

(3j). White solid (25 mg, 76% yield); mp 173-175 °C.  $^1H$  NMR (400 MHz,  $CDCl_3$ )  $\delta$  7.57 (t,  $J = 2.0$  Hz, 1H), 7.53-7.43 (m, 7H), 7.35 (t,  $J = 7.6$  Hz, 1H), 5.01 (s, 1H), 3.41 (ddd,  $J = 10.8, 9.2, 5.6$  Hz, 1H), 2.98 (dt,  $J = 10.4, 9.6$  Hz, 1H), 2.74-2.65 (m, 1H), 2.52 (ddd,  $J = 14.8, 8.8, 5.6$  Hz, 1H).  $^{13}C$  NMR (100 MHz,  $CDCl_3$ )  $\delta$  168.5, 144.2, 134.0, 132.6, 131.0, 130.9, 130.5, 129.2, 129.0, 128.8, 128.7, 126.8, 95.0, 45.6, 29.4. HRMS (ESI)  $m/z$  calcd for  $C_{17}H_{14}ClN_3NaO_2$   $[M + Na]^+$  350.0672; found 350.0685.

1-Phenyl-4-(4-(trifluoromethyl)phenyl)-7,8-dihydro-1H,6H-pyrazolo[1,2-

d][1,2,4,5]oxatriazin-6-one (**3k**). White solid (33 mg, 91% yield ); mp 168-169 °C. <sup>1</sup>H NMR (400 MHz, CDCl<sub>3</sub>) δ 7.69 (dd, *J* = 11.2, 8.4 Hz, 4H), 7.54-7.45 (m, 5H), 5.04 (s, 1H), 3.44 (ddd, *J* = 10.8, 8.8, 5.6 Hz, 1H), 3.01 (dt, *J* = 11.2, 8.8 Hz, 1H), 2.75-2.67 (m, 1H), 2.54 (ddd, *J* = 14.4, 8.8, 5.6 Hz, 1H). <sup>13</sup>C NMR (100 MHz, CDCl<sub>3</sub>) δ 168.5, 144.3, 132.8 (*J* = 1.4 Hz), 132.6, 132.2 (*J* = 32.4 Hz), 131.0, 129.1, 129.0, 128.9, 125.0 (*J* = 3.7 Hz), 123.9 (*J* = 271.1 Hz), 95.2, 45.7, 29.4. HRMS (ESI) *m/z* calcd for C<sub>18</sub>H<sub>15</sub>F<sub>3</sub>N<sub>3</sub>O<sub>2</sub> [M + H]<sup>+</sup> 362.1116; found 362.1108.

4-(4-Nitrophenyl)-1-phenyl-7,8-dihydro-1H,6H-pyrazolo[1,2-d][1,2,4,5]oxatriazin-6-one (**3l**). Yellow solid (26 mg, 78% yield ); mp 184-185 °C. <sup>1</sup>H NMR (400 MHz, CDCl<sub>3</sub>) δ 8.28 (d, *J* = 8.8 Hz, 2H), 7.77 (d, *J* = 8.8 Hz, 2H), 7.55-7.47 (m, 5H), 5.06 (s, 1H), 3.43 (ddd, *J* = 11.2, 9.2, 6.0 Hz, 1H), 3.06 (dt, *J* = 10.8, 9.2 Hz, 1H), 2.78-2.69 (m, 1H), 2.57 (ddd, *J* = 15.2, 9.2, 6.0 Hz, 1H). <sup>13</sup>C NMR (100 MHz, CDCl<sub>3</sub>) δ 168.8, 149.0, 143.7, 135.4, 132.4, 131.1, 129.6, 129.1, 128.8, 123.2, 95.2, 45.7, 29.3. HRMS (ESI) *m/z* calcd for C<sub>17</sub>H<sub>14</sub>N<sub>4</sub>NaO<sub>4</sub> [M + Na]<sup>+</sup> 361.0913; found 361.0915.

4-(3,4-Dichlorophenyl)-1-phenyl-7,8-dihydro-1H,6H-pyrazolo[1,2-d][1,2,4,5]oxatriazin-6-one (**3m**). White solid (29 mg, 81% yield ); mp 147-149 °C. <sup>1</sup>H NMR (400 MHz, CDCl<sub>3</sub>) δ 7.68 (d, *J* = 2.0 Hz, 1H), 7.54-7.45 (m, 6H), 7.41 (dd, *J* = 8.3, 2.1 Hz, 1H), 5.01 (s, 1H), 3.44 (ddd, *J* = 10.8, 8.8, 6.0 Hz, 1H), 3.01 (dt, *J* = 11.2, 8.8 Hz, 1H), 2.75-2.66 (m, 1H), 2.54 (ddd, *J* = 14.8, 8.8, 5.6 Hz, 1H). <sup>13</sup>C NMR (100 MHz, CDCl<sub>3</sub>) δ 168.8, 143.5, 134.8, 132.5, 132.5, 131.0, 130.4, 130.0, 129.2, 129.1, 128.8, 127.8, 95.1, 45.6, 29.4. HRMS (ESI) *m/z* calcd for C<sub>17</sub>H<sub>14</sub>Cl<sub>2</sub>N<sub>3</sub>O<sub>2</sub> [M + H]<sup>+</sup> 362.0463; found 362.0449.

4-(2,3-Dichlorophenyl)-1-phenyl-7,8-dihydro-1H,6H-pyrazolo[1,2-d][1,2,4,5]oxatriazin-6-

one (**3n**). White solid (20 mg, 55% yield ); mp 165-166 °C. <sup>1</sup>H NMR (400 MHz, CDCl<sub>3</sub>) δ 7.58-7.53 (m, 3H), 7.52-7.45 (m, 3H), 7.39 (dd, *J* = 7.6, 1.6 Hz, 1H), 7.29 (dd, *J* = 15.3, 7.5 Hz, 1H), 4.95 (s, 1H), 3.27-3.23 (m, 1H), 2.86-2.68 (m, 2H), 2.49-2.43 (m, 1H). <sup>13</sup>C NMR (100 MHz, CDCl<sub>3</sub>) δ 165.1, 142.5, 133.1, 132.6, 132.2, 132.1, 131.0, 131.0, 129.2, 129.0, 129.0, 127.4, 95.3, 47.4, 30.1. HRMS (ESI) *m/z* calcd for C<sub>17</sub>H<sub>14</sub>Cl<sub>2</sub>N<sub>3</sub>O<sub>2</sub> [M + H]<sup>+</sup> 362.0463; found 362.0438.

1-(2-Chlorophenyl)-4-phenyl-7,8-dihydro-1H,6H-pyrazolo[1,2-d][1,2,4,5]oxatriazin-6-one

(**3ba**). White solid (16 mg, 49% yield ); mp 157-159 °C. <sup>1</sup>H NMR (400 MHz, CDCl<sub>3</sub>) δ 7.69-7.64 (m, 1H), 7.62-7.59 (m, 2H), 7.50-7.39 (m, 6H), 5.67 (s, 1H), 3.51-3.44 (m, 1H), 3.17-3.10 (m, 1H), 2.72-2.56 (m, 2H). <sup>13</sup>C NMR (100 MHz, CDCl<sub>3</sub>) δ 169.6, 145.4, 134.3, 131.6, 130.8, 130.7, 130.6, 129.5, 129.3, 128.4, 128.1, 127.9, 89.9, 44.8, 29.7. HRMS (ESI) *m/z* calcd for C<sub>17</sub>H<sub>14</sub>ClN<sub>3</sub>NaO<sub>2</sub> [M + Na]<sup>+</sup> 350.0672; found 350.0693.

1-(3-Chlorophenyl)-4-phenyl-7,8-dihydro-1H,6H-pyrazolo[1,2-d][1,2,4,5]oxatriazin-6-one

(**3ca**). White solid (18 mg, 55% yield ); mp 159-161 °C. <sup>1</sup>H NMR (400 MHz, CDCl<sub>3</sub>) δ 7.58-7.54 (m, 3H), 7.51-7.45 (m, 2H), 7.44-7.38 (m, 4H), 4.99 (s, 1H), 3.42 (ddd, *J* = 10.8, 9.2, 5.2 Hz, 1H), 2.96 (dt, *J* = 10.8, 9.2 Hz, 1H), 2.75-2.66 (m, 1H), 2.52 (ddd, *J* = 14.0, 8.8, 5.2 Hz, 1H). <sup>13</sup>C NMR (100 MHz, CDCl<sub>3</sub>) δ 168.0, 145.5, 135.0, 134.8, 131.0, 130.5, 130.3, 129.0, 128.9, 128.6, 128.0, 127.0, 94.1, 45.7, 29.5. HRMS (ESI) *m/z* calcd for C<sub>17</sub>H<sub>14</sub>ClN<sub>3</sub>NaO<sub>2</sub> [M + Na]<sup>+</sup> 350.0672; found 350.0693.

1-(4-Chlorophenyl)-4-phenyl-7,8-dihydro-1H,6H-pyrazolo[1,2-d][1,2,4,5]oxatriazin-6-one

(**3da**). White solid (20 mg, 60% yield ); mp 158-159 °C. <sup>1</sup>H NMR (400 MHz, CDCl<sub>3</sub>) δ 7.58-7.55 (m, 2H), 7.51-7.45 (m, 4H), 7.44-7.40 (m, 2H), 7.38-7.34 (m, 1H), 4.95 (s, 1H), 3.27-

3.23 (m, 1H), 2.86-2.68 (m, 2H), 2.50-2.44 (m, 1H). <sup>13</sup>C NMR (100 MHz, CDCl<sub>3</sub>) δ 165.2, 143.0, 134.1, 132.4, 131.4, 131.0, 131.0, 129.2, 129.0, 128.8, 128.7, 126.8, 95.3, 47.4, 30.2. HRMS (ESI) m/z calcd for C<sub>17</sub>H<sub>14</sub>ClN<sub>3</sub>NaO<sub>2</sub> [M + Na]<sup>+</sup> 350.0672; found 350.0693.

1-(2-Bromophenyl)-4-phenyl-7,8-dihydro-1H,6H-pyrazolo[1,2-d][1,2,4,5]oxatriazin-6-one  
**(3ea)**. White solid (17 mg, 47% yield); mp 165-167 °C. <sup>1</sup>H NMR (400 MHz, CDCl<sub>3</sub>) δ 7.65 (d, *J* = 8.0 Hz, 2H), 7.62 (d, *J* = 7.6 Hz, 2H), 7.51-7.41 (m, 4H), 7.35 (td, *J* = 8.0, 2.0 Hz, 1H), 5.65 (s, 1H), 3.49 (dt, *J* = 11.2, 8.0 Hz, 1H), 3.21-3.14 (m, 1H), 2.75-2.61 (m, 2H). <sup>13</sup>C NMR (100 MHz, CDCl<sub>3</sub>) δ 169.8, 145.4, 132.8, 132.5, 131.9, 131.1, 130.6, 129.3, 128.5, 128.4, 128.1, 124.3, 92.4, 44.7, 29.8. HRMS (ESI) m/z calcd for C<sub>17</sub>H<sub>14</sub>BrN<sub>3</sub>NaO<sub>2</sub> [M + Na]<sup>+</sup> 394.0167; found 394.0160.

1-(4-Bromophenyl)-4-phenyl-7,8-dihydro-1H,6H-pyrazolo[1,2-d][1,2,4,5]oxatriazin-6-one  
**(3fa)**. White solid (20 mg, 54% yield); mp 165-167 °C. <sup>1</sup>H NMR (400 MHz, CDCl<sub>3</sub>) δ 7.62 (d, *J* = 8.4 Hz, 2H), 7.56 (d, *J* = 8.4 Hz, 2H), 7.51-7.46 (m, 1H), 7.45-7.41 (m, 4H), 5.00 (s, 1H), 3.41 (ddd, *J* = 10.8, 9.2, 5.2 Hz, 1H), 2.95 (dt, *J* = 11.2, 8.8 Hz, 1H), 2.76-2.67 (m, 1H), 2.53 (ddd, *J* = 14.0, 8.8, 5.2 Hz, 1H). <sup>13</sup>C NMR (100 MHz, CDCl<sub>3</sub>) δ 167.9, 145.5, 132.3, 132.0, 130.5, 130.4, 129.1, 128.6, 128.1, 125.3, 94.3, 45.7, 29.6. HRMS (ESI) m/z calcd for C<sub>17</sub>H<sub>14</sub>BrN<sub>3</sub>NaO<sub>2</sub> [M + Na]<sup>+</sup> 394.0167; found 394.0186.

1-(4-Fluorophenyl)-4-phenyl-7,8-dihydro-1H,6H-pyrazolo[1,2-d][1,2,4,5]oxatriazin-6-one  
**(3ga)**. White solid (17 mg, 55% yield); mp 150-152 °C. <sup>1</sup>H NMR (400 MHz, CDCl<sub>3</sub>) δ 7.58-7.40 (m, 7H), 7.17 (t, *J* = 8.4 Hz, 2H), 5.02 (s, 1H), 3.40 (ddd, *J* = 10.8, 9.2, 5.2 Hz, 1H), 2.95 (dt, *J* = 10.8, 9.2 Hz, 1H), 2.76-2.67 (m, 1H), 2.52 (ddd, *J* = 14.0, 8.8, 4.8 Hz, 1H). <sup>13</sup>C NMR (100 MHz, CDCl<sub>3</sub>) δ 168.0, 164.2 (*J* = 248.6 Hz), 145.4, 130.8 (*J* = 8.8 Hz), 130.5, 129.1,



128.9 ( $J = 2.9$  Hz), 128.6, 128.0, 116.2 ( $J = 21.9$  Hz), 94.3, 45.7, 29.6. HRMS (ESI)  $m/z$  calcd for  $C_{17}H_{14}FN_3NaO_2$   $[M + Na]^+$  334.0968; found 334.1003.

4-Phenyl-1-(4-(trifluoromethyl)phenyl)-7,8-dihydro-1H,6H-pyrazolo[1,2-d][1,2,4,5]oxatriazin-6-one (**3ha**). White solid (22 mg, 62% yield); mp 148-150 °C.  $^1H$  NMR (400 MHz,  $CDCl_3$ )  $\delta$  7.76 (d,  $J = 8.0$  Hz, 2H), 7.68 (d,  $J = 8.4$  Hz, 2H), 7.58-7.55 (m, 2H), 7.52-7.41 (m, 3H), 5.09 (s, 1H), 3.42 (ddd,  $J = 10.8, 8.8, 5.2$  Hz, 1H), 2.96 (dt,  $J = 10.8, 9.2$  Hz, 1H), 2.78-2.69 (m, 1H), 2.54 (ddd,  $J = 14.0, 8.8, 5.2$  Hz, 1H).  $^{13}C$  NMR (100 MHz,  $CDCl_3$ )  $\delta$  167.9, 145.6, 136.7, 132.9 ( $J = 32.7$  Hz), 130.6, 129.4, 129.0, 128.6, 128.1, 126.0 ( $J = 3.6$  Hz), 123.7 ( $J = 271.5$  Hz), 94.1, 45.7, 29.5. HRMS (ESI)  $m/z$  calcd for  $C_{18}H_{14}F_3N_3NaO_2$   $[M + Na]^+$  384.0936; found 384.0967.

4-Phenyl-1-(p-tolyl)-7,8-dihydro-1H,6H-pyrazolo[1,2-d][1,2,4,5]oxatriazin-6-one (**3ia**). White solid (14 mg, 47% yield); mp 159-160 °C.  $^1H$  NMR (400 MHz,  $CDCl_3$ )  $\delta$  7.57 (d,  $J = 7.6$  Hz, 2H), 7.49-7.40 (m, 5H), 7.30 (d,  $J = 7.6$  Hz, 2H), 5.00 (s, 1H), 3.41 (ddd,  $J = 10.8, 9.2, 5.2$  Hz, 1H), 2.98 (dt,  $J = 11.2, 8.8$  Hz, 1H), 2.74-2.65 (m, 1H), 2.51 (ddd,  $J = 14.0, 8.8, 5.2$  Hz, 1H), 2.41 (s, 3H).  $^{13}C$  NMR (100 MHz,  $CDCl_3$ )  $\delta$  168.2, 145.3, 141.0, 130.4, 130.0, 129.7, 129.3, 128.7, 128.6, 128.0, 95.1, 45.7, 29.7, 21.4. HRMS (ESI)  $m/z$  calcd for  $C_{18}H_{18}N_3O_2$   $[M + H]^+$  308.1399; found 308.1403.

1-(4-Methoxyphenyl)-4-phenyl-7,8-dihydro-1H,6H-pyrazolo[1,2-d][1,2,4,5]oxatriazin-6-one (**3ja**). White solid (18 mg, 55% yield); mp 151-153 °C.  $^1H$  NMR (400 MHz,  $CDCl_3$ )  $\delta$  7.56 (d,  $J = 8.0$  Hz, 2H), 7.50-7.40 (m, 5H), 6.98 (d,  $J = 8.8$  Hz, 2H), 4.99 (s, 1H), 3.85 (s, 3H), 3.40 (ddd,  $J = 10.8, 9.2, 5.2$  Hz, 1H), 2.97 (dt,  $J = 10.8, 9.2$  Hz, 1H), 2.74-2.65 (m, 1H), 2.51 (ddd,  $J = 14.0, 8.8, 5.2$  Hz, 1H).  $^{13}C$  NMR (100 MHz,  $CDCl_3$ )  $\delta$  168.2, 161.5, 145.2, 130.4, 130.1,

129.3, 128.6, 128.0, 125.0, 114.4, 94.8, 55.4, 45.7, 29.7. HRMS (ESI)  $m/z$  calcd for  $C_{18}H_{18}N_3O_3$   $[M + H]^+$  324.1348; found 324.1370.

4-Phenyl-1-(thiophen-2-yl)-7,8-dihydro-1H,6H-pyrazolo[1,2-d][1,2,4,5]oxatriazin-6-one

**(3ka)**. White solid (16 mg, 53% yield); mp 176-178 °C.  $^1H$  NMR (400 MHz,  $CDCl_3$ )  $\delta$  7.57-7.54 (m, 3H), 7.50-7.46 (m, 1H), 7.44-7.40 (m, 2H), 7.34 (dd,  $J = 3.6, 1.2$  Hz, 1H), 7.11 (dd,  $J = 5.2, 3.6$  Hz, 1H), 5.10 (s, 1H), 3.55 (ddd,  $J = 10.8, 9.2, 5.2$  Hz, 1H), 3.08 (dt,  $J = 11.2, 9.2$  Hz, 1H), 2.78-2.68 (m, 1H), 2.54 (ddd,  $J = 14.4, 9.2, 5.6$  Hz, 1H).  $^{13}C$  NMR (100 MHz,  $CDCl_3$ )  $\delta$  168.0, 145.4, 134.7, 130.5, 129.4, 129.3, 129.0, 128.6, 128.0, 126.9, 90.6, 45.9, 29.5. HRMS (ESI)  $m/z$  calcd for  $C_{15}H_{13}N_3NaO_2S$   $[M + Na]^+$  322.0626; found 322.0629.

1-Butyl-4-phenyl-7,8-dihydro-1H,6H-pyrazolo[1,2-d][1,2,4,5]oxatriazin-6-one **(3la)**. White solid (14 mg, 52% yield); mp 147-149 °C.  $^1H$  NMR (400 MHz,  $CDCl_3$ )  $\delta$  7.49-7.43 (m, 3H), 7.44-7.37 (m, 2H), 4.20 (dd,  $J = 6.8, 2.8$  Hz, 1H), 3.73 (td,  $J = 9.6, 3.6$  Hz, 1H), 3.07-2.30 (m, 1H), 2.73 (ddd,  $J = 16.8, 11.2, 9.2$  Hz, 1H), 2.54 (ddd,  $J = 12.0, 8.4, 3.6$  Hz, 1H), 1.93-1.84 (m, 1H), 1.82-1.73 (m, 1H), 1.70-1.49 (m, 2H), 1.47-1.36 (m, 2H), 0.96 (t,  $J = 7.2$  Hz, 3H).  $^{13}C$  NMR (100 MHz,  $CDCl_3$ )  $\delta$  166.7, 145.5, 130.2, 129.2, 128.6, 127.9, 93.4, 46.1, 30.3, 29.6, 25.4, 22.7, 13.9. HRMS (ESI)  $m/z$  calcd for  $C_{15}H_{20}N_3O_2$   $[M + H]^+$  274.1556; found 274.1579.

1-(4-Bromophenyl)-4-(4-methoxyphenyl)-7,8-dihydro-1H,6H-pyrazolo[1,2-d][1,2,4,5]oxatriazin-6-one **(3fe)**. White solid (18 mg, 46% yield); mp 170-172 °C.  $^1H$  NMR (400 MHz,  $CDCl_3$ )  $\delta$  7.61 (d,  $J = 8.4$  Hz, 2H), 7.50 (d,  $J = 8.8$  Hz, 2H), 7.40 (d,  $J = 8.4$  Hz, 2H), 6.94 (d,  $J = 8.4$  Hz, 2H), 4.99 (s, 1H), 3.84 (s, 3H), 3.46-3.37 (m, 1H), 3.01-2.92 (m, 1H), 2.76-2.66 (m, 1H), 2.57-2.49 (m, 1H).  $^{13}C$  NMR (100 MHz,  $CDCl_3$ )  $\delta$  168.4, 161.4, 145.2, 132.3, 132.3, 132.1, 130.4, 130.1, 128.3, 125.2, 121.3, 113.6, 94.2, 55.3, 45.4, 29.6. HRMS

(ESI)  $m/z$  calcd for  $C_{18}H_{17}BrN_3O_3$   $[M + H]^+$  402.0453; found 402.0473.

1-(4-Bromophenyl)-4-(4-(trifluoromethyl)phenyl)-7,8-dihydro-1H,6H-pyrazolo[1,2-d][1,2,4,5]oxatriazin-6-one (**3fk**). White solid (25 mg, 58% yield); mp 191-192 °C.  $^1H$  NMR (400 MHz,  $CDCl_3$ )  $\delta$  7.69 (s, 4H), 7.64 ( $J = 8.4$  Hz, 2H), 7.41 ( $J = 8.4$  Hz, 2H), 5.01 (s, 1H), 3.45 (ddd,  $J = 10.8, 9.2, 5.2$  Hz, 1H), 3.00 (dt,  $J = 10.8, 9.2$  Hz, 1H), 2.78-2.69 (m, 1H), 2.55 (ddd,  $J = 14.8, 9.2, 5.6$  Hz, 1H).  $^{13}C$  NMR (100 MHz,  $CDCl_3$ )  $\delta$  168.2, 146.0, 144.4, 142.9, 133.2 ( $J = 30.8$  Hz), 132.4, 131.6, 130.4, 129.0, 125.0 ( $J = 3.7$  Hz), 124.0 ( $J = 271.1$  Hz), 94.4, 45.8, 29.4. HRMS (ESI)  $m/z$  calcd for  $C_{18}H_{14}BrF_3N_3O_2$   $[M + H]^+$  440.0221; found 440.0244.

**Procedure for the synthesis of 4.** To a solution of **3fa** (37 mg, 0.10 mmol) in THF/ $H_2O$  (2 mL, 9:1) was added  $Pd(PPh_3)_4$  (11 mg, 0.01 mmol), phenylboronic acid (25 mg, 0.20 mmol), and  $Na_2CO_3$  (16 mg, 0.15 mmol). The resulting mixture was stirred at 80 °C for 10 h under  $N_2$ . Upon completion of the reaction, water (5 mL) was added and the mixture was extracted with DCM (3  $\times$  5 mL). The combined organic layers were dried and concentrated under reduced pressure followed by silica gel column chromatography purification (petroleum ether/ethyl acetate = 5:1) to give the coupling product **4** (21 mg, 58% yield) as a white solid; mp 150-152 °C.  $^1H$  NMR (400 MHz,  $CDCl_3$ )  $\delta$  7.67 (d,  $J = 8.0$  Hz, 2H), 7.61-7.56 (m, 6H), 7.48-7.36 (m, 6H), 5.04 (s, 1H), 3.41 (ddd,  $J = 10.8, 8.8, 5.2$  Hz, 1H), 2.98 (dt,  $J = 11.2, 8.8$  Hz, 1H), 2.71-2.62 (m, 1H), 2.49 (ddd,  $J = 14.4, 9.2, 5.6$  Hz, 1H).  $^{13}C$  NMR (100 MHz,  $CDCl_3$ )  $\delta$  168.3, 145.3, 143.6, 140.1, 131.7, 130.4, 129.3, 129.2, 128.9, 128.5, 128.0, 127.9, 127.7, 127.2, 94.8, 45.7, 29.6. HRMS (ESI)  $m/z$  calcd for  $C_{23}H_{19}N_3NaO_2$   $[M + Na]^+$  392.1375; found 392.1394.

## References

1. (a) R. Na, C. Jing, Q. Xu, H. Jiang, X. Wu, J. Shi, J. Zhong, M. Wang, D. Benitez and E. Tkatchouk, *J. Am. Chem. Soc.*, 2011, **133**, 13337; (b) S. E. Winterton, and J. M. Ready, *Org. Lett.*, 2016, **18**, 2608.
2. (a) L. Jiang, T. Gao, Z. Li, S. Sun, C. Kim, C. Huang, H. Guo, J. Wang and Y. Xing, *Tetrahedron Lett.*, 2016, **57**, 712; (b) L. F. Minuti, M. G. Memeo, S. Crespi and P. Quadrelli, *Eur. J. Org. Chem.*, 2016, 821.

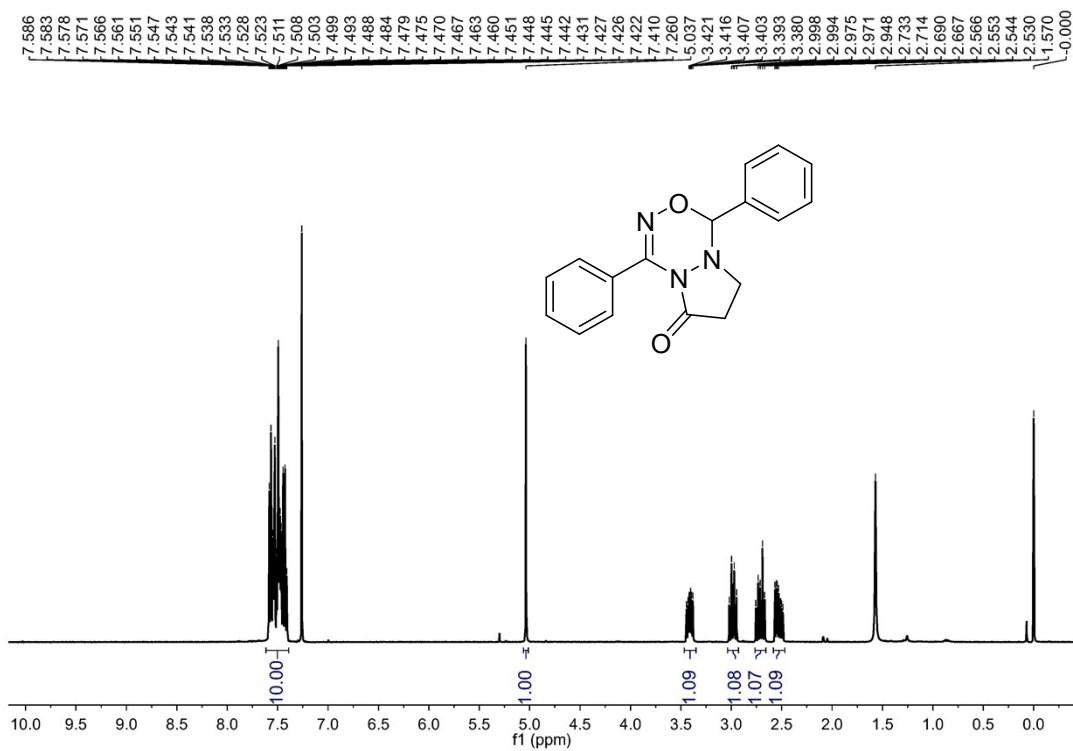

<sup>1</sup>H NMR Spectrum (400 MHz, CDCl<sub>3</sub>) of Compound 3a

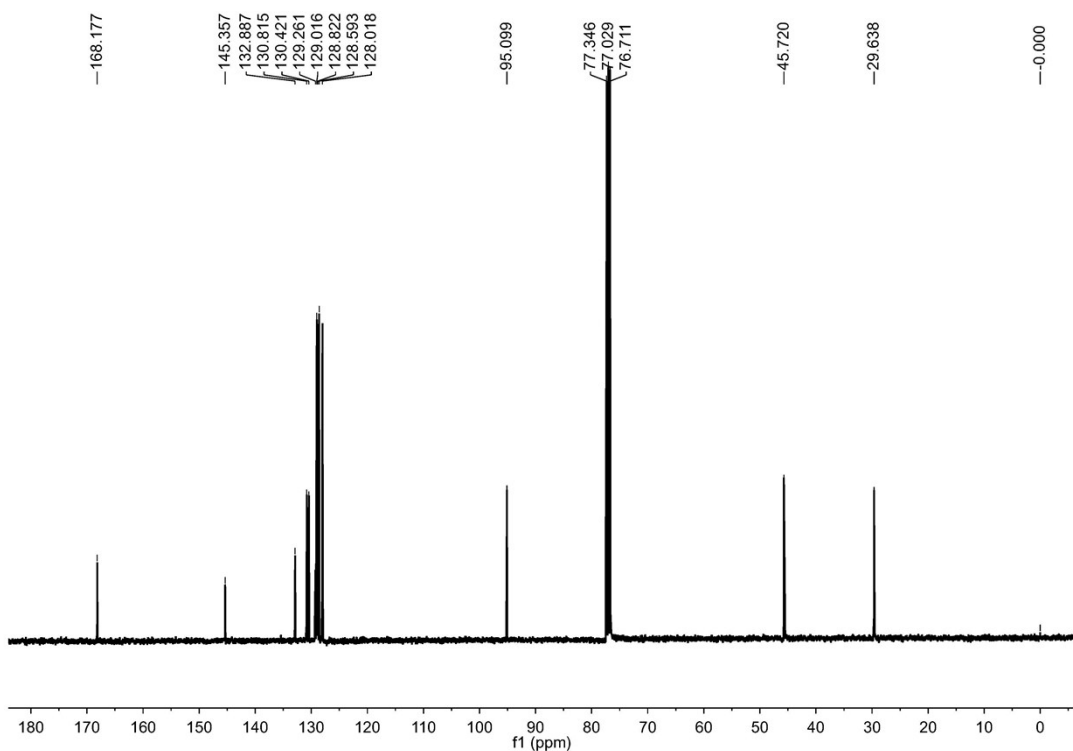

<sup>13</sup>C NMR Spectrum (100 MHz, CDCl<sub>3</sub>) of Compound 3a

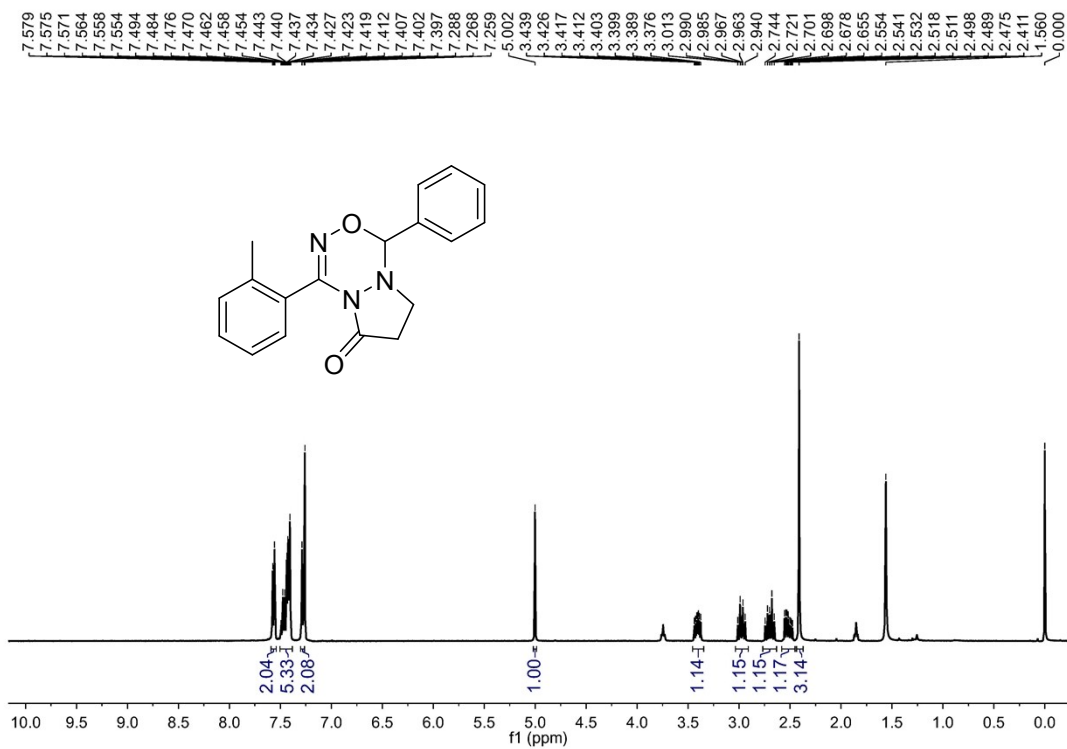

<sup>1</sup>H NMR Spectrum (400 MHz, CDCl<sub>3</sub>) of Compound 3b

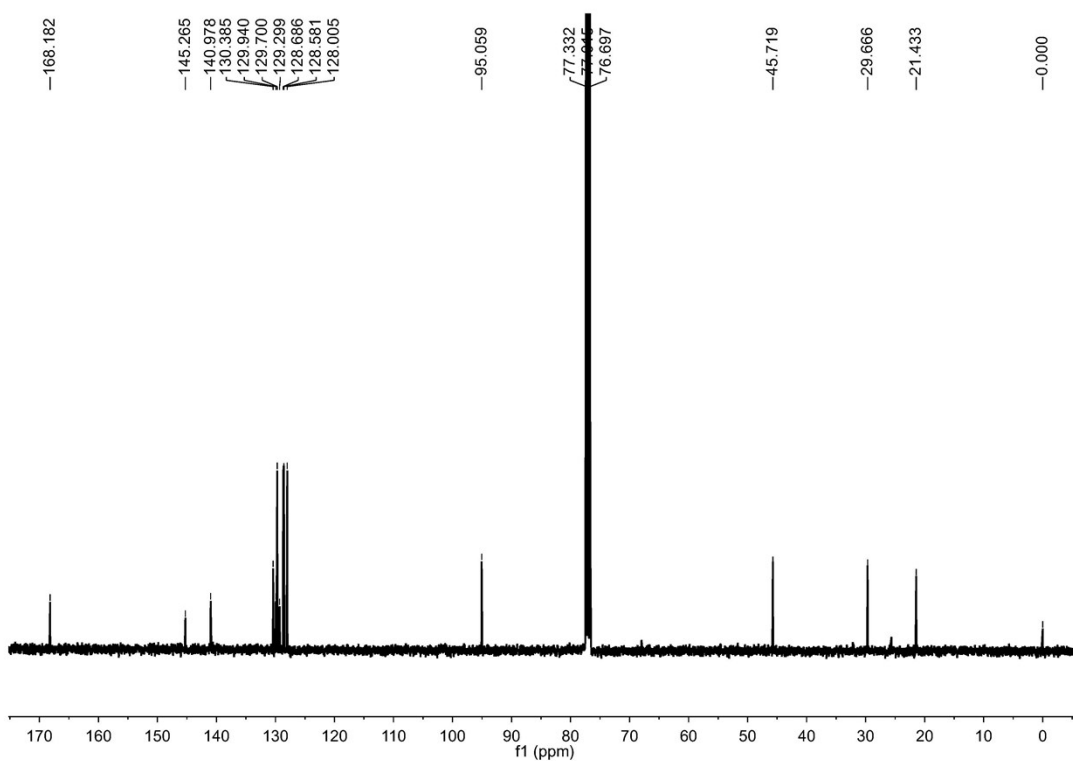

<sup>13</sup>C NMR Spectrum (100 MHz, CDCl<sub>3</sub>) of Compound 3b

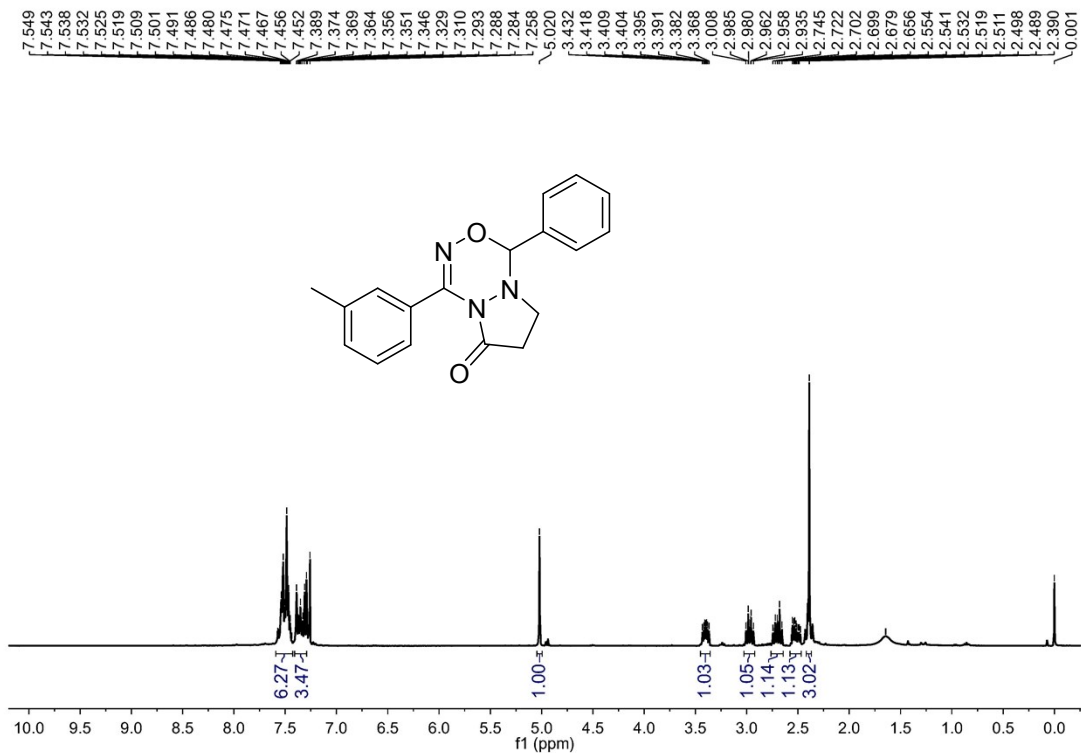

<sup>1</sup>H NMR Spectrum (400 MHz, CDCl<sub>3</sub>) of Compound 3c

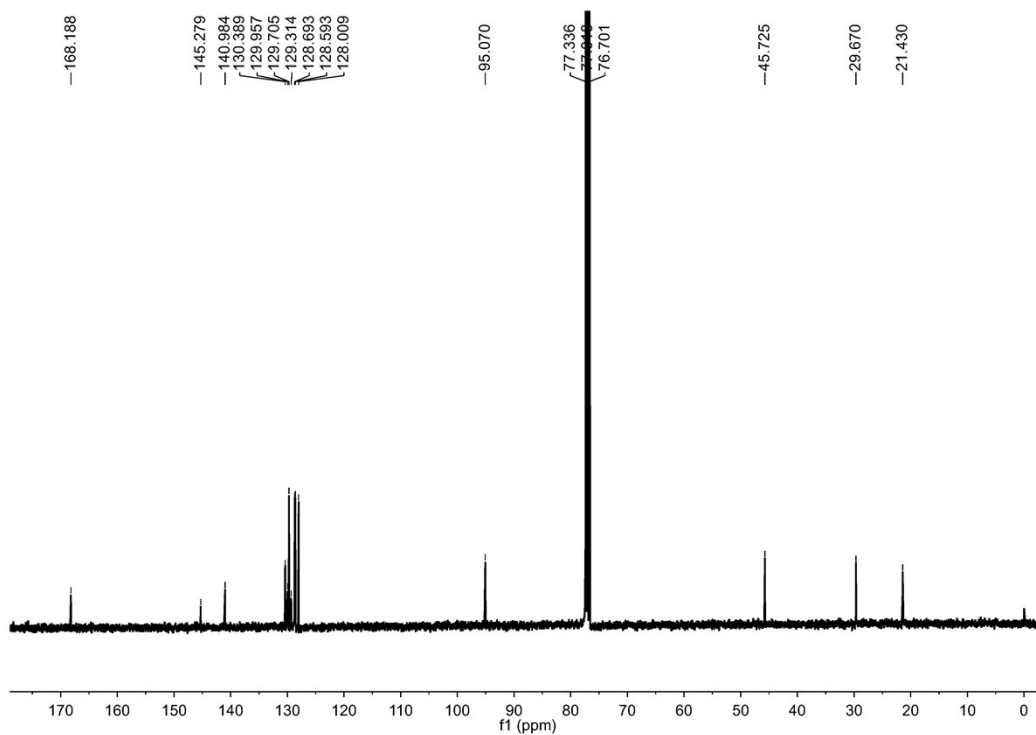

<sup>13</sup>C NMR Spectrum (100 MHz, CDCl<sub>3</sub>) of Compound 3c

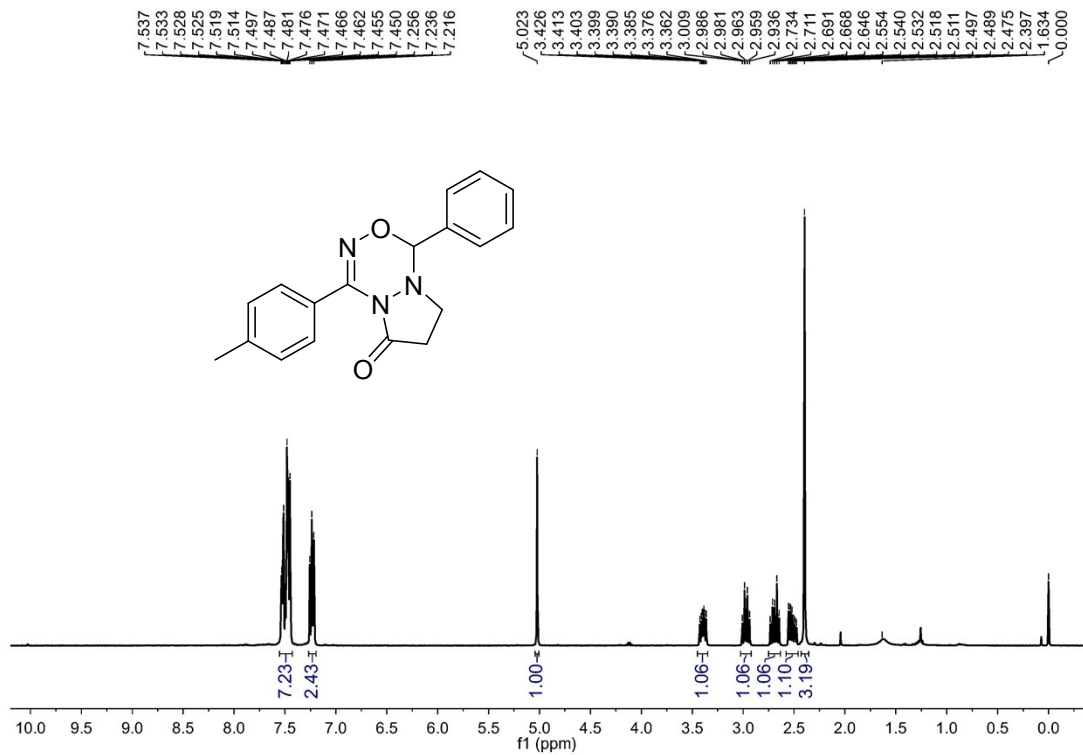

**<sup>1</sup>H NMR Spectrum (400 MHz, CDCl<sub>3</sub>) of Compound 3d**

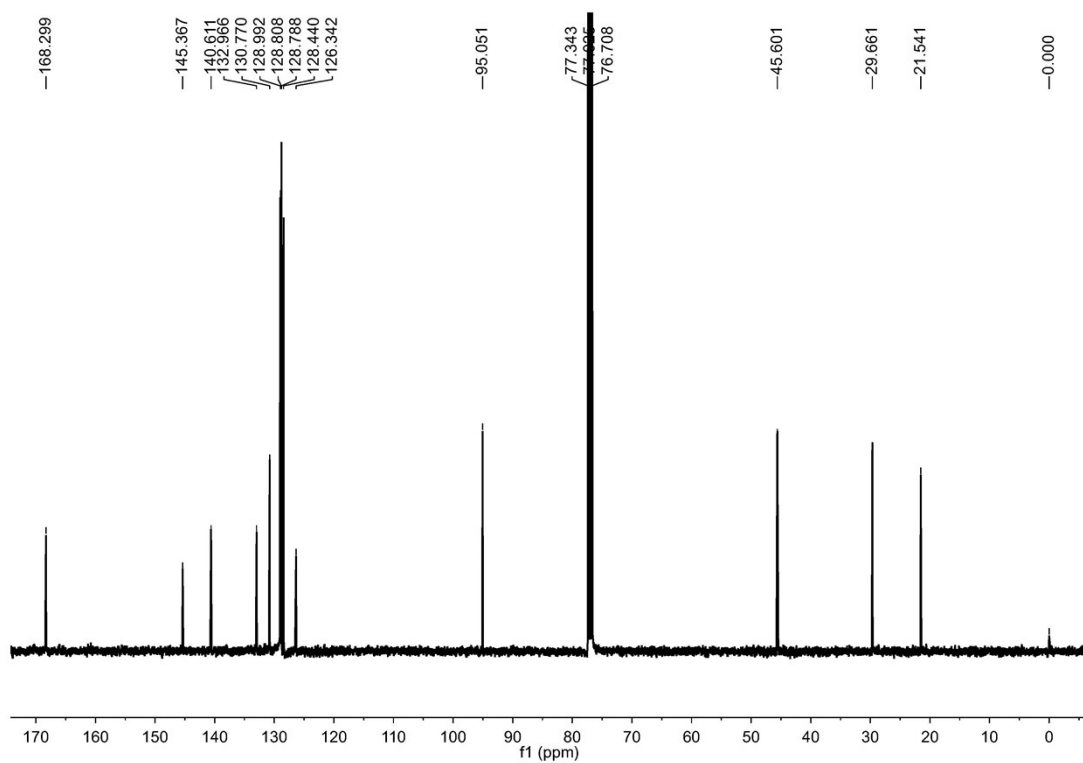

**<sup>13</sup>C NMR Spectrum (100 MHz, CDCl<sub>3</sub>) of Compound 3d**



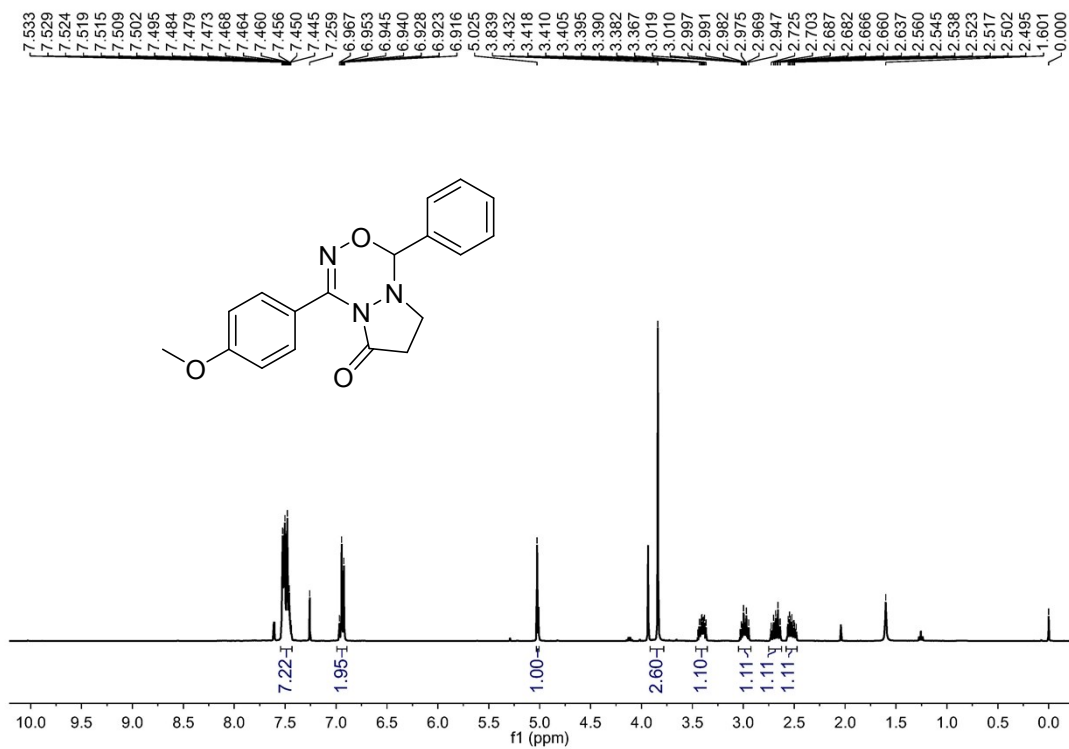

<sup>1</sup>H NMR Spectrum (400 MHz, CDCl<sub>3</sub>) of Compound 3e

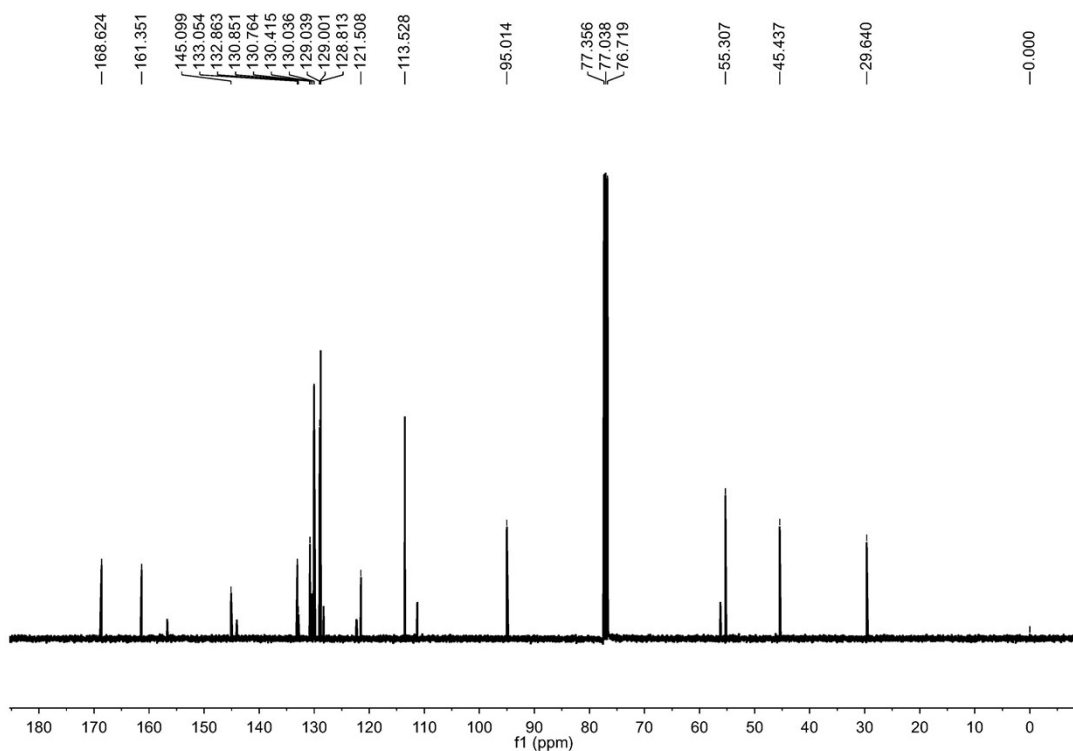

<sup>13</sup>C NMR Spectrum (100 MHz, CDCl<sub>3</sub>) of Compound 3e

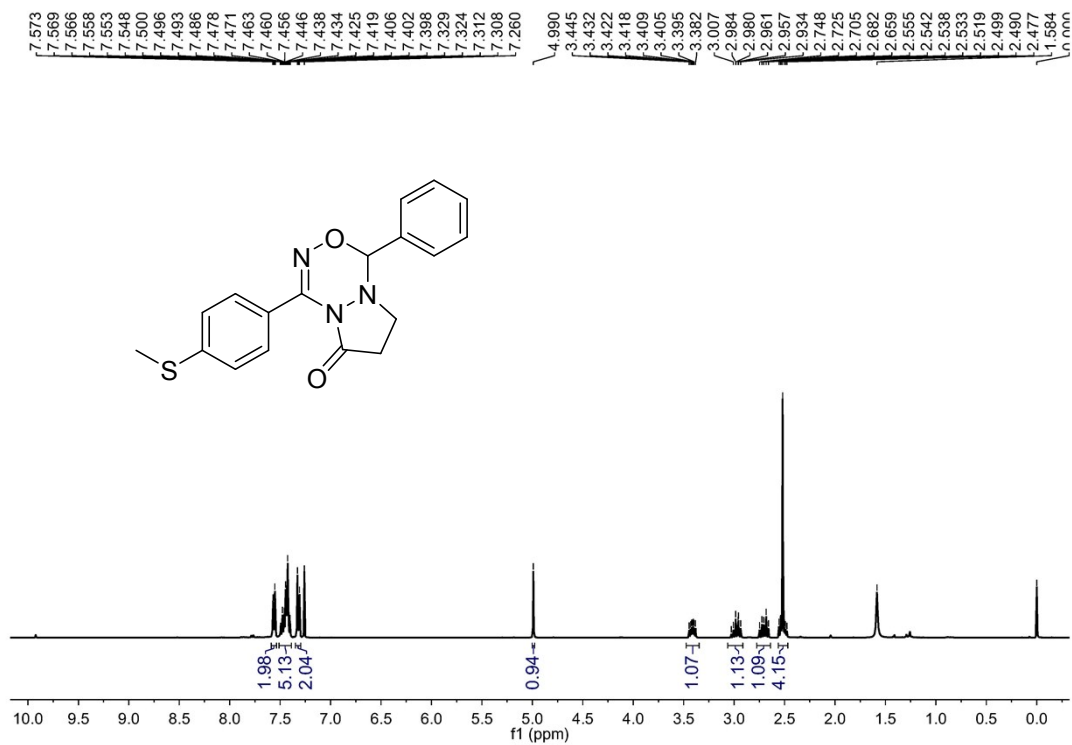

<sup>1</sup>H NMR Spectrum (400 MHz, CDCl<sub>3</sub>) of Compound 3f

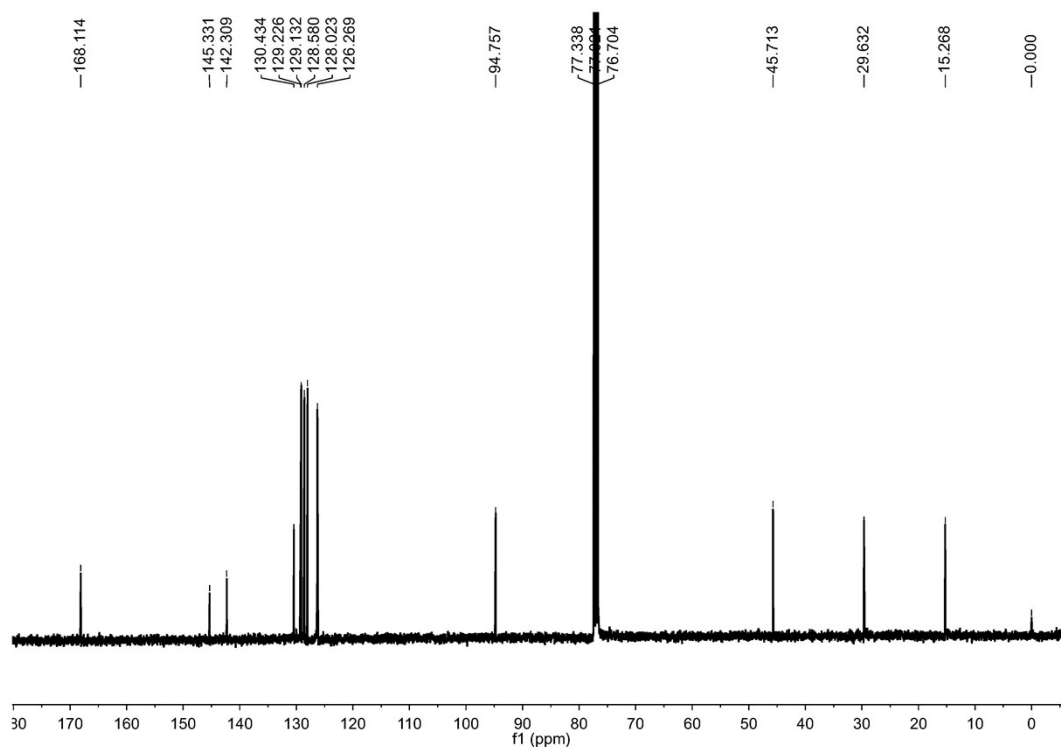

<sup>13</sup>C NMR Spectrum (100 MHz, CDCl<sub>3</sub>) of Compound 3f

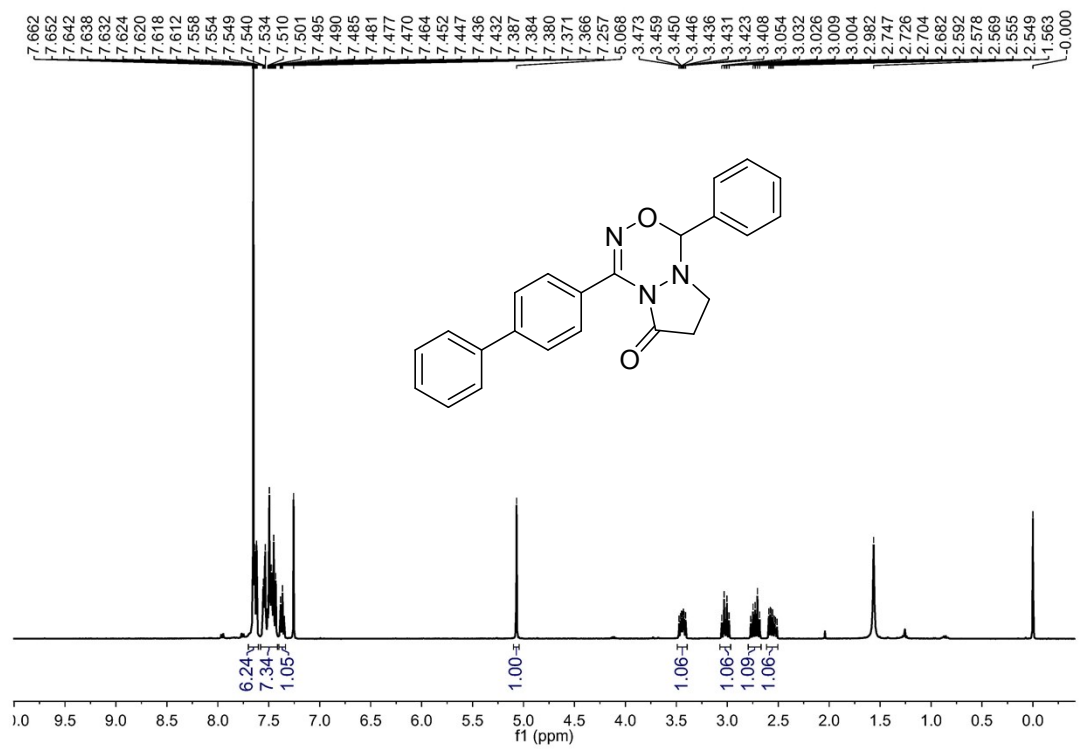

<sup>1</sup>H NMR Spectrum (400 MHz, CDCl<sub>3</sub>) of Compound 3g

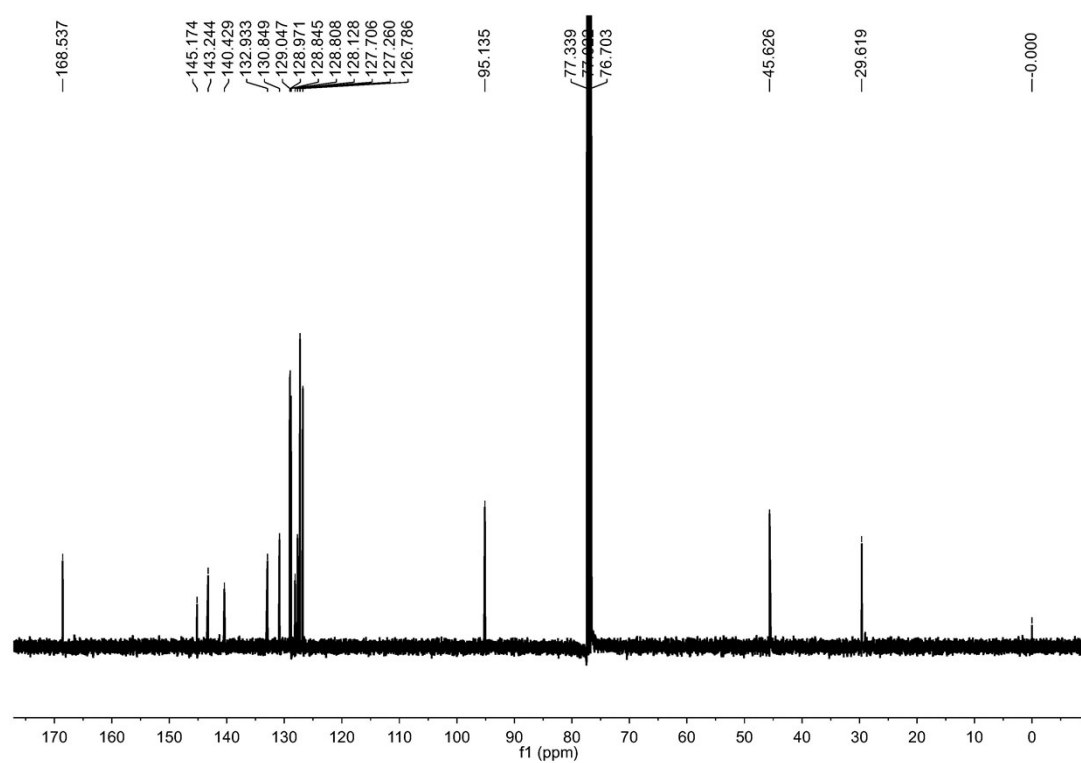

<sup>13</sup>C NMR Spectrum (100 MHz, CDCl<sub>3</sub>) of Compound 3g

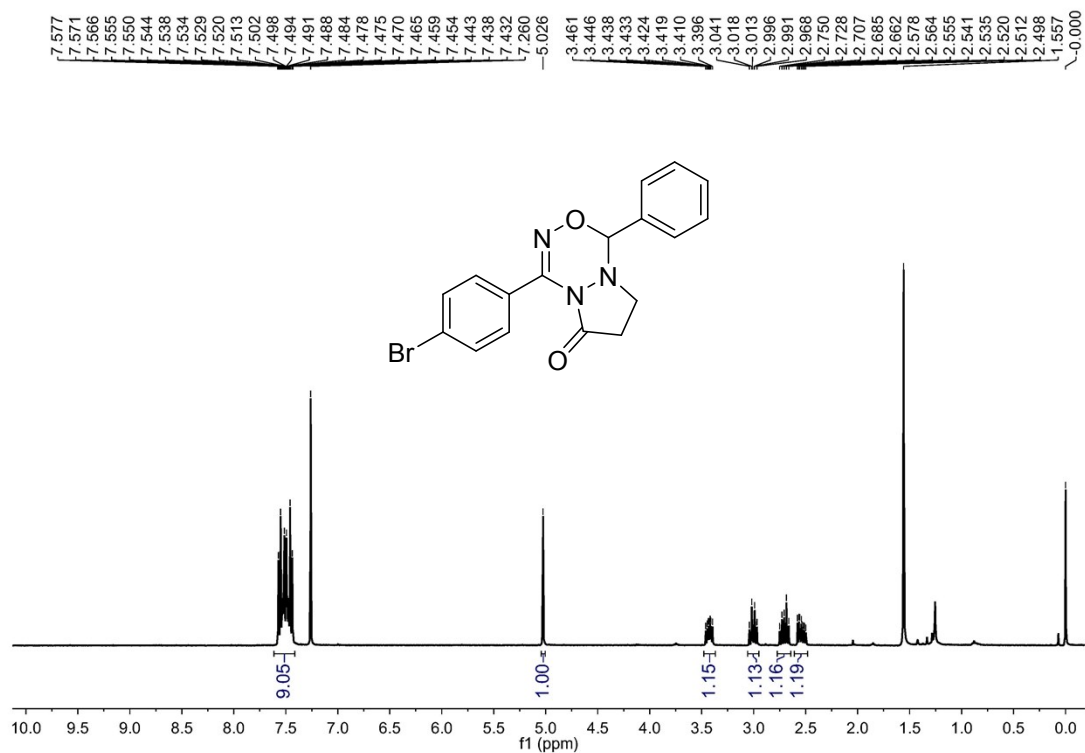

<sup>1</sup>H NMR Spectrum (400 MHz, CDCl<sub>3</sub>) of Compound 3h

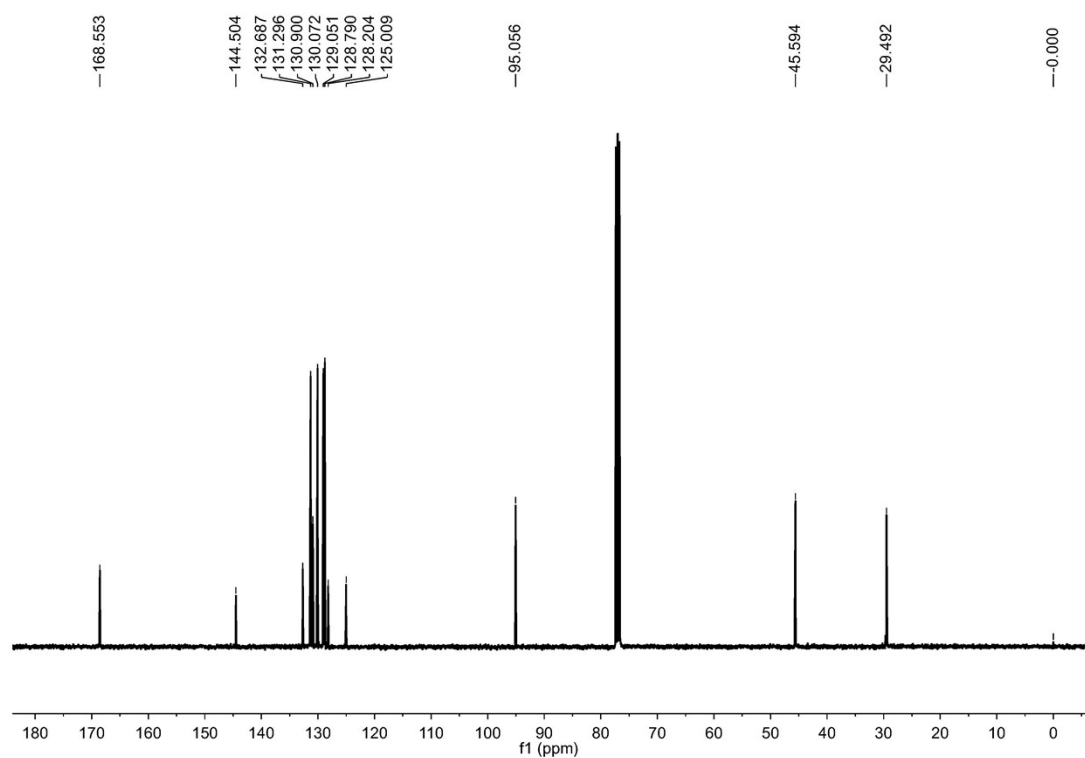

<sup>13</sup>C NMR Spectrum (100 MHz, CDCl<sub>3</sub>) of Compound 3h

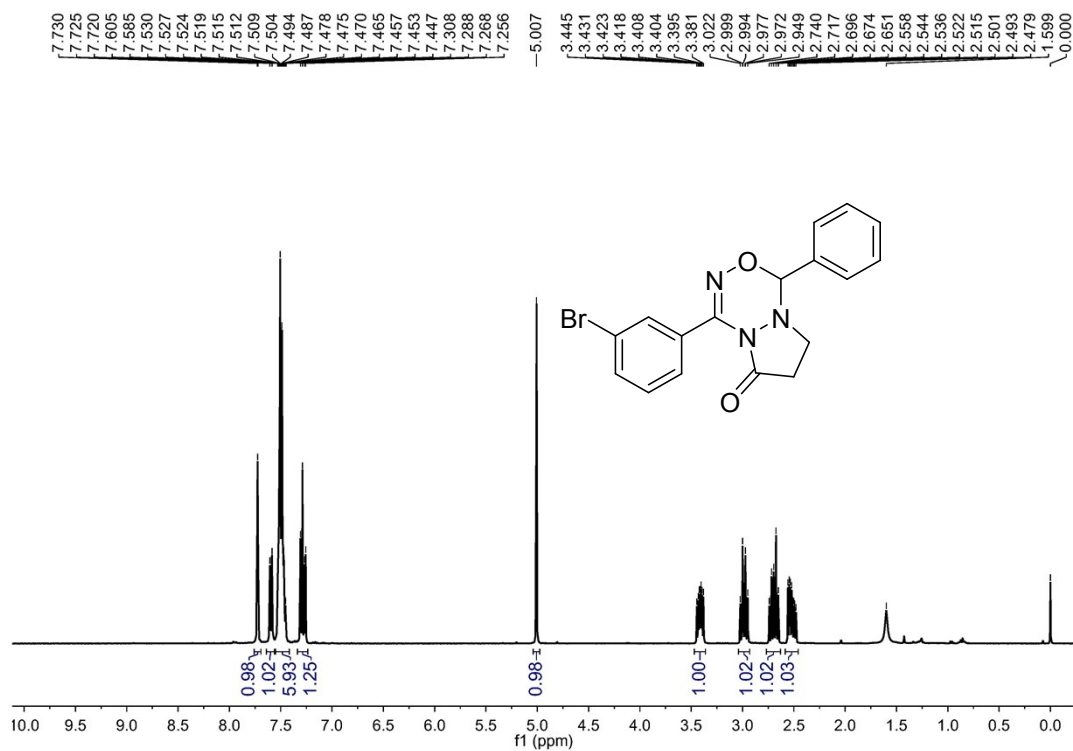

**<sup>1</sup>H NMR Spectrum (400 MHz, CDCl<sub>3</sub>) of Compound **3i****

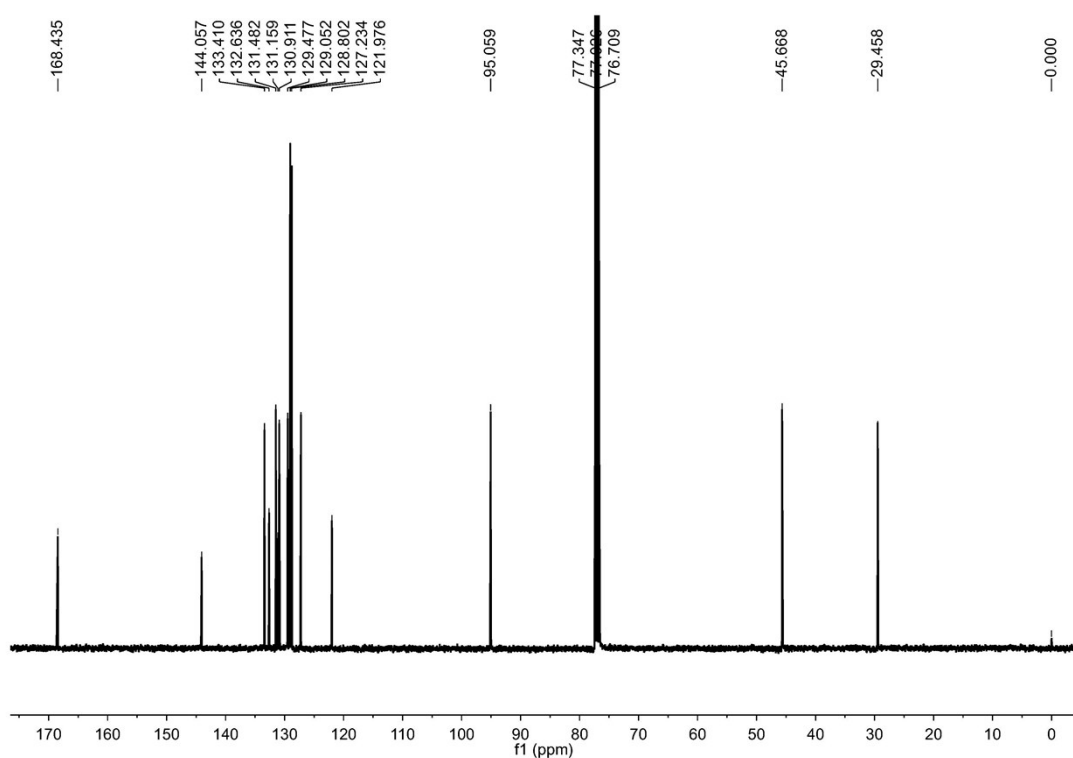

**<sup>13</sup>C NMR Spectrum (100 MHz, CDCl<sub>3</sub>) of Compound **3i****

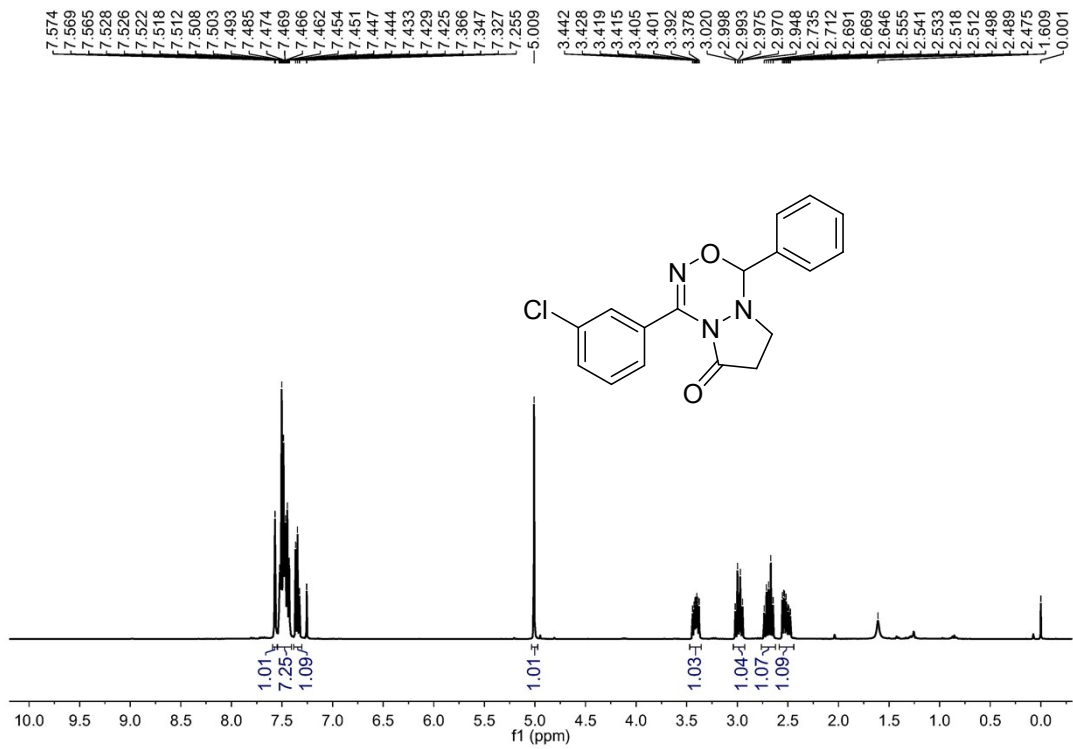

<sup>1</sup>H NMR Spectrum (400 MHz, CDCl<sub>3</sub>) of Compound 3j

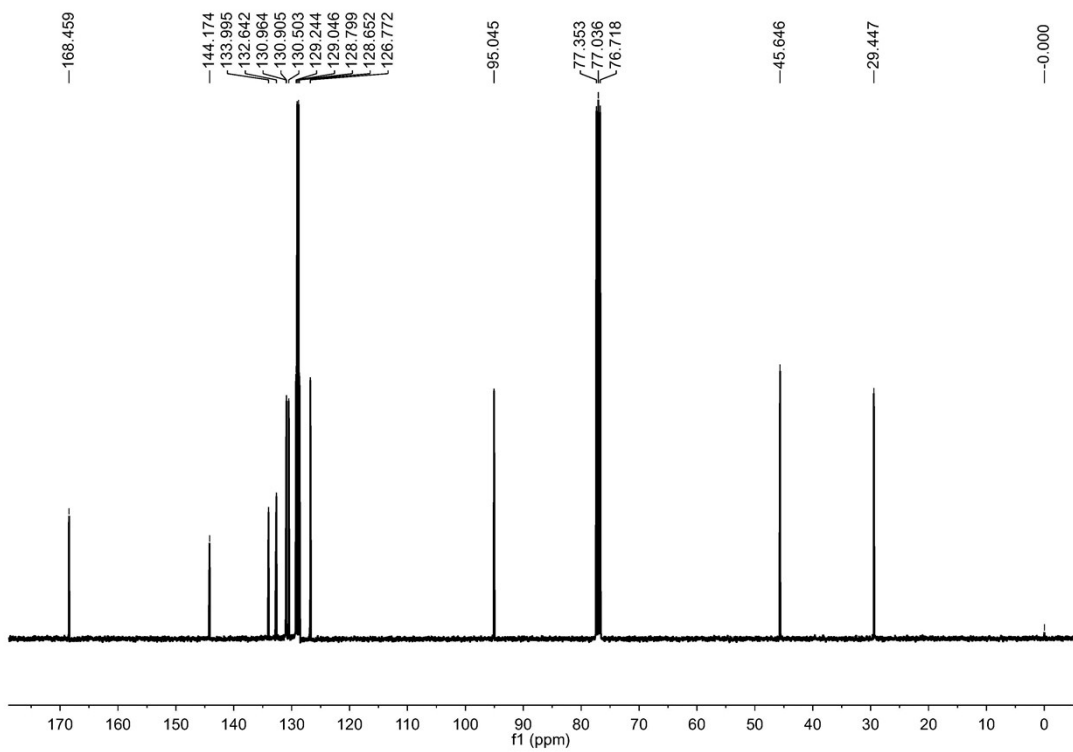

<sup>13</sup>C NMR Spectrum (100 MHz, CDCl<sub>3</sub>) of Compound 3j

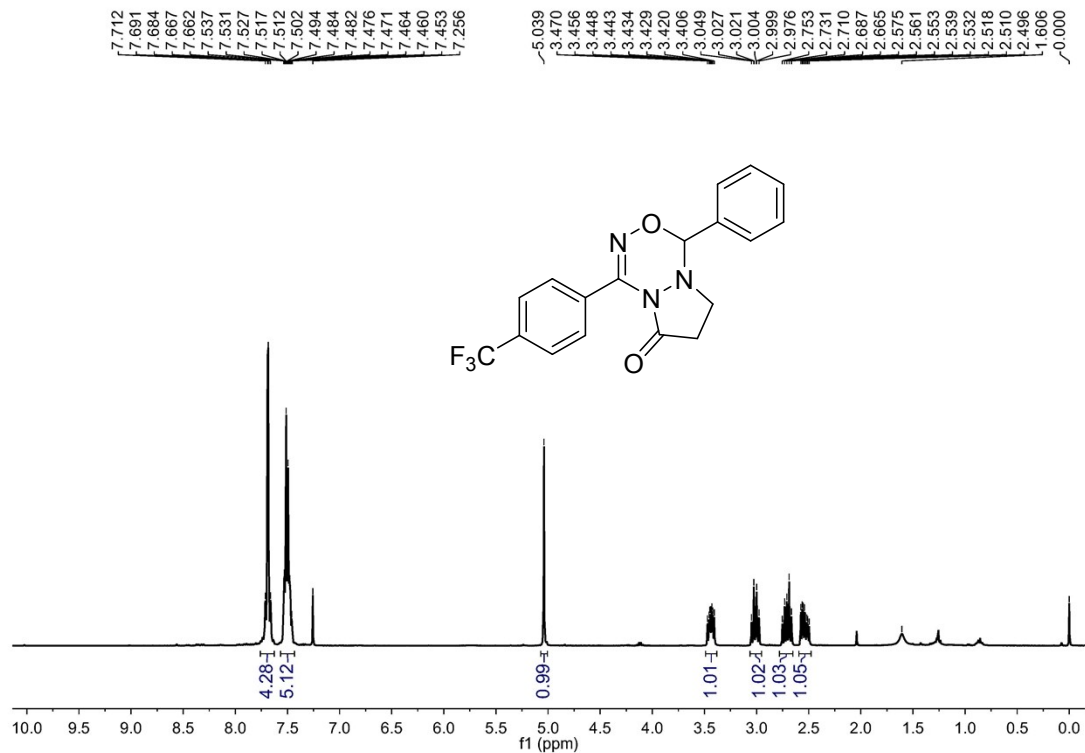

<sup>1</sup>H NMR Spectrum (400 MHz, CDCl<sub>3</sub>) of Compound 3k

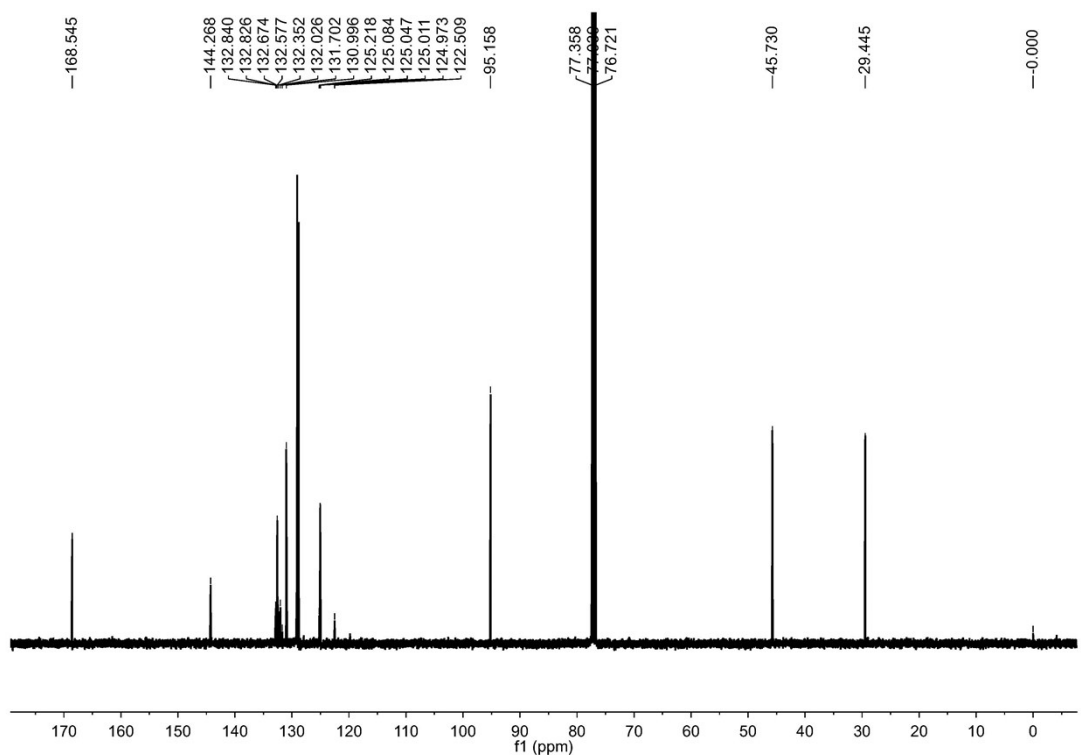

<sup>13</sup>C NMR Spectrum (100 MHz, CDCl<sub>3</sub>) of Compound 3k

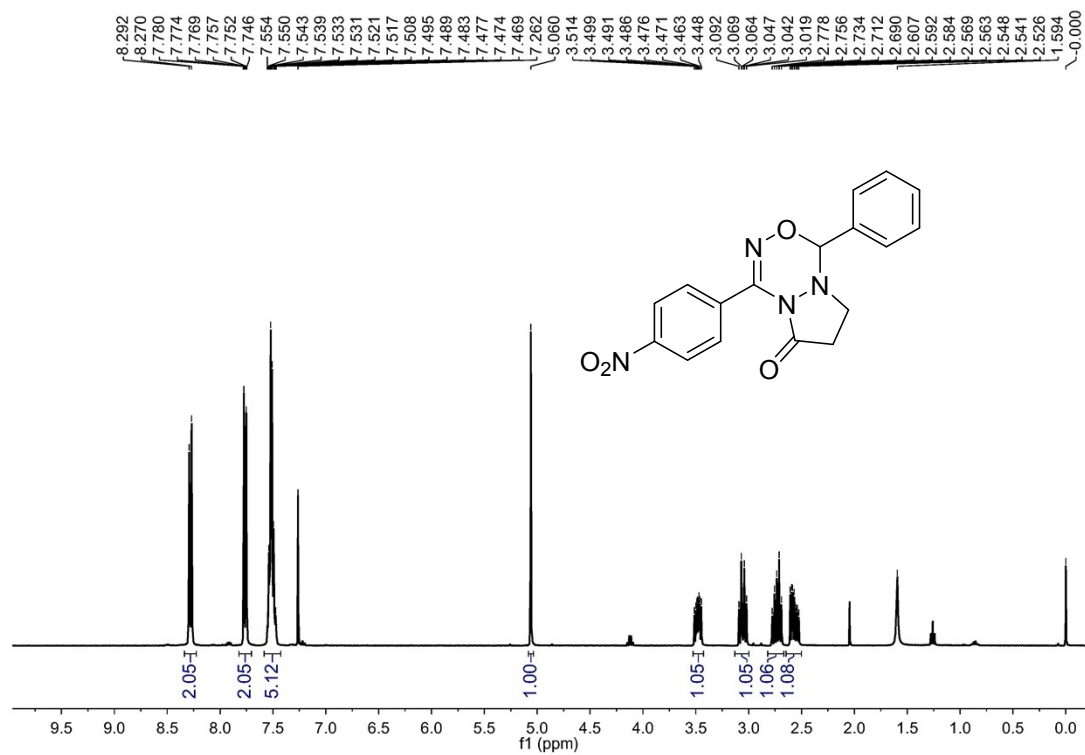

<sup>1</sup>H NMR Spectrum (400 MHz, CDCl<sub>3</sub>) of Compound 3I

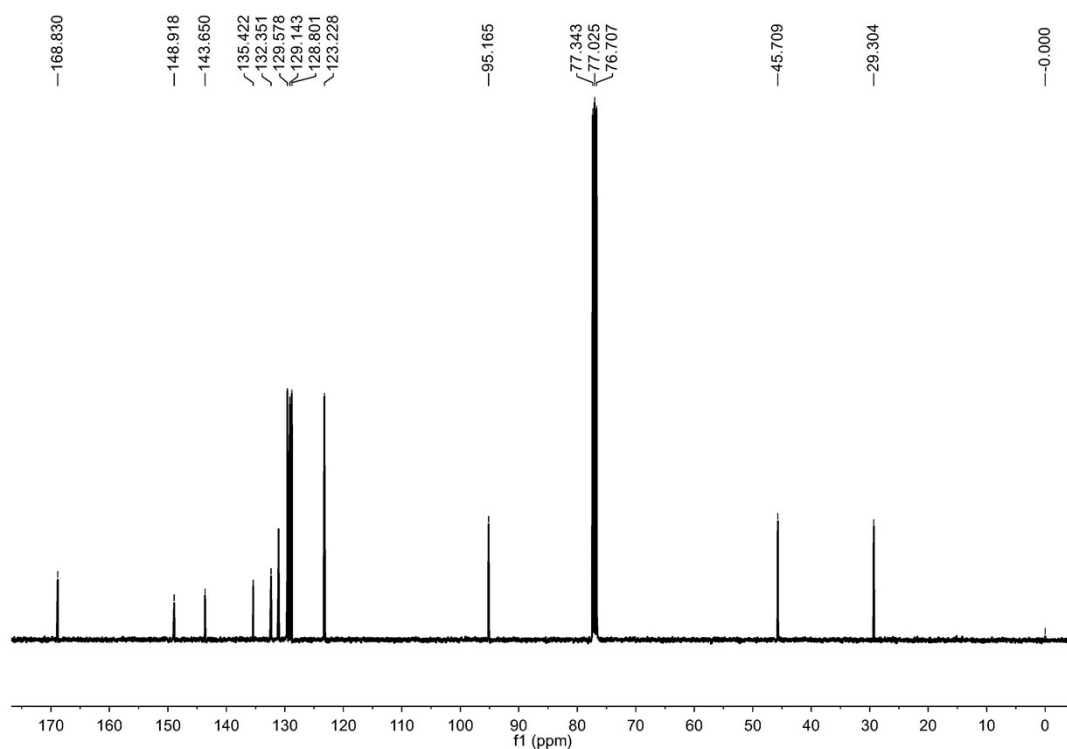

<sup>13</sup>C NMR Spectrum (100 MHz, CDCl<sub>3</sub>) of Compound 3I



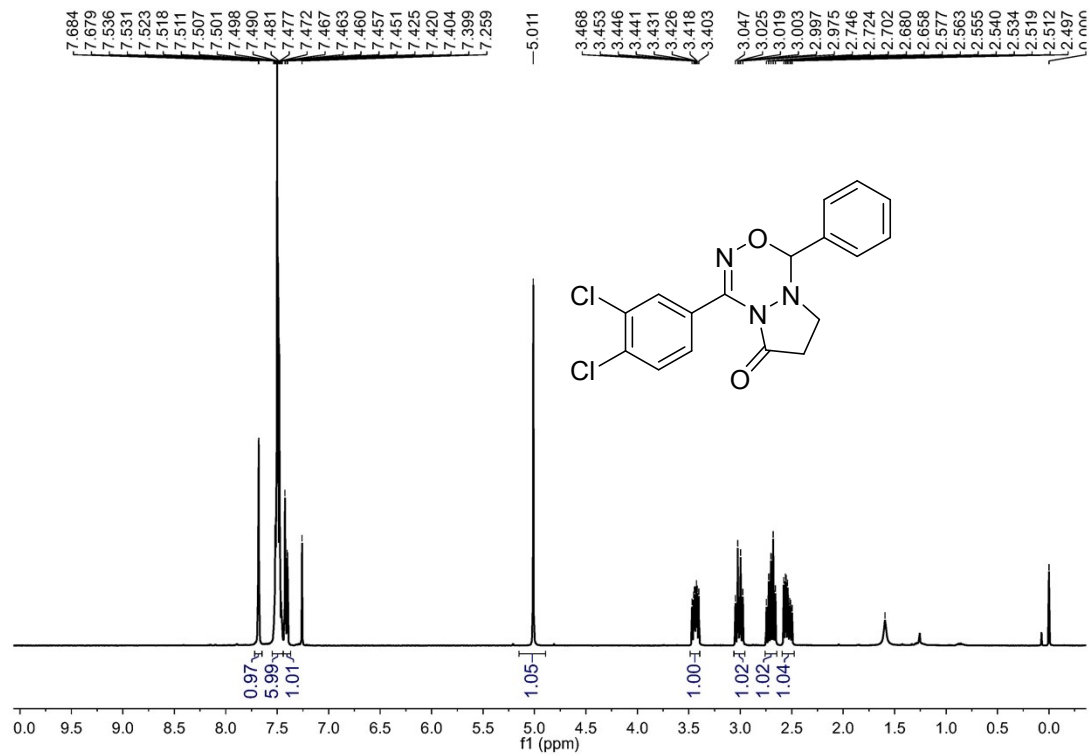

**<sup>1</sup>H NMR Spectrum (400 MHz, CDCl<sub>3</sub>) of Compound **3m****

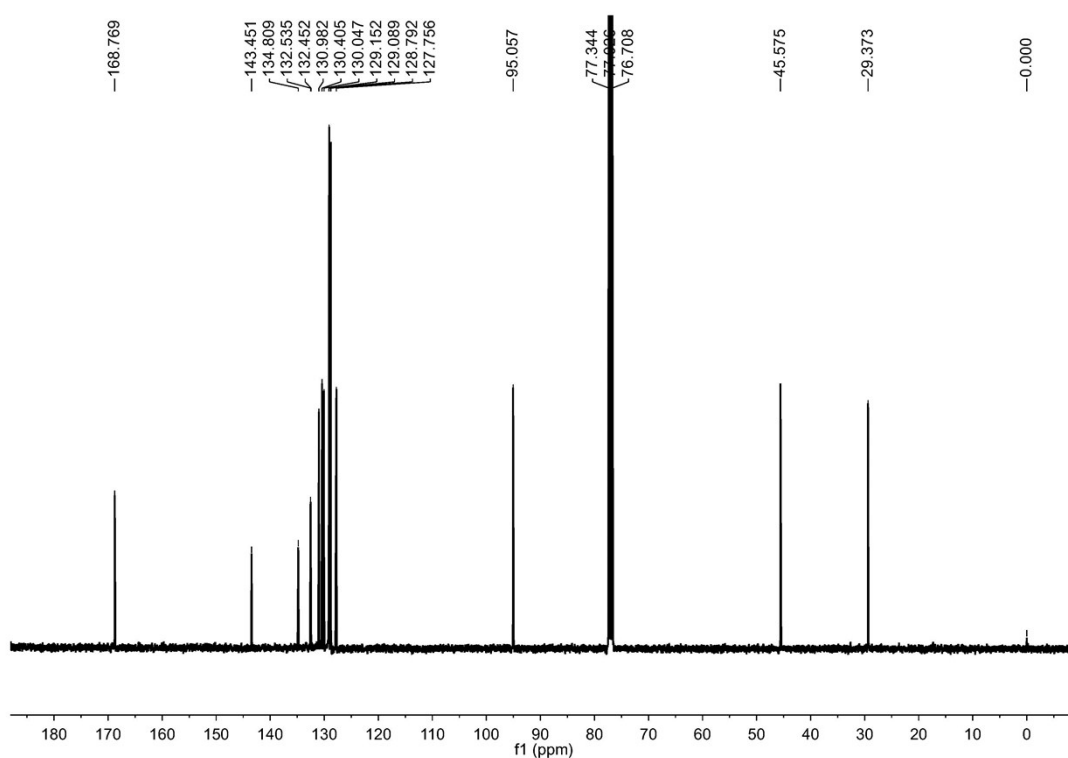

**<sup>13</sup>C NMR Spectrum (100 MHz, CDCl<sub>3</sub>) of Compound **3m****

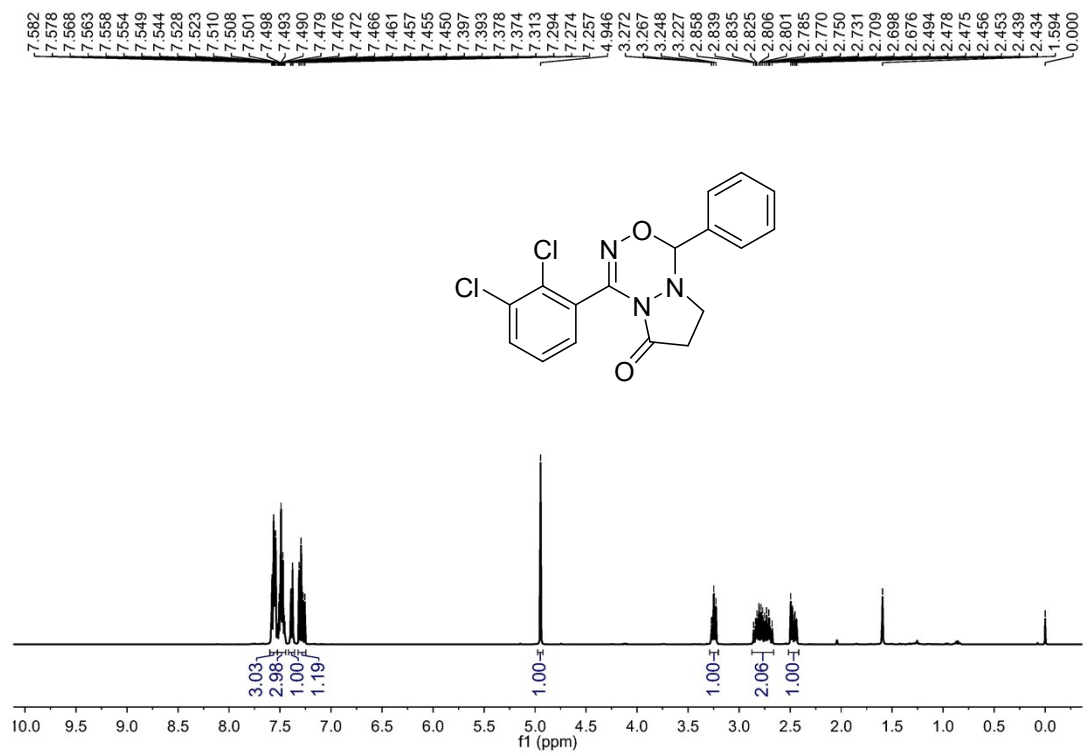

<sup>1</sup>H NMR Spectrum (400 MHz, CDCl<sub>3</sub>) of Compound **3n**

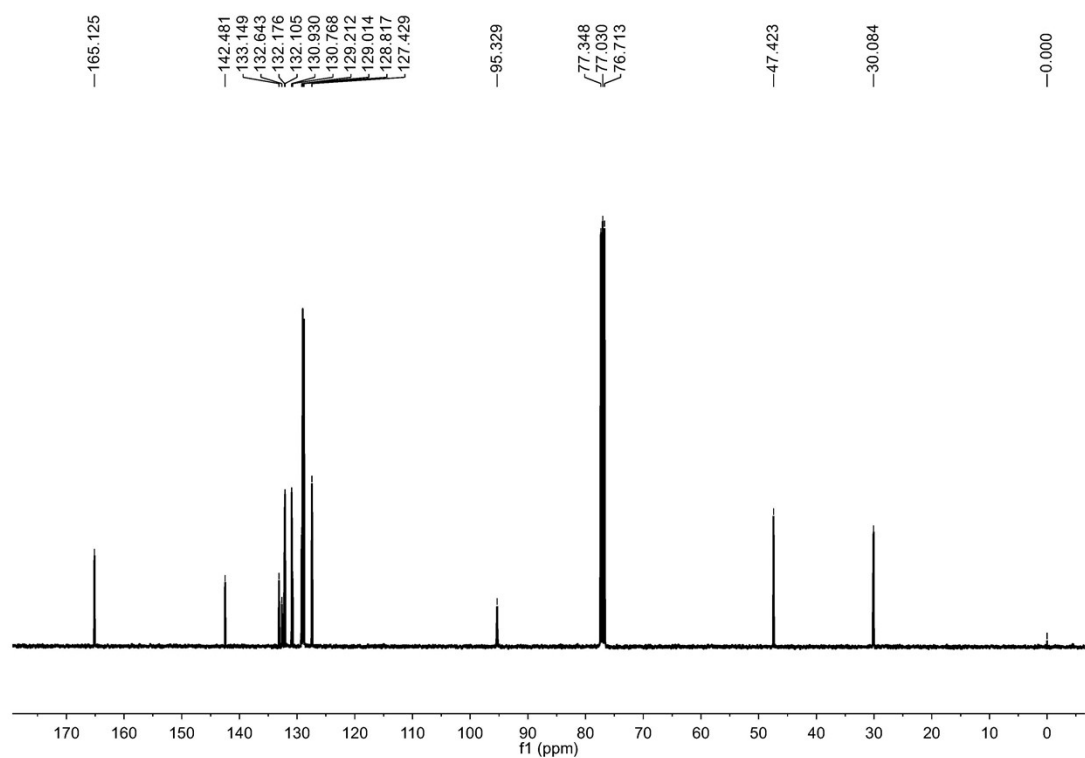

<sup>13</sup>C NMR Spectrum (100 MHz, CDCl<sub>3</sub>) of Compound **3n**

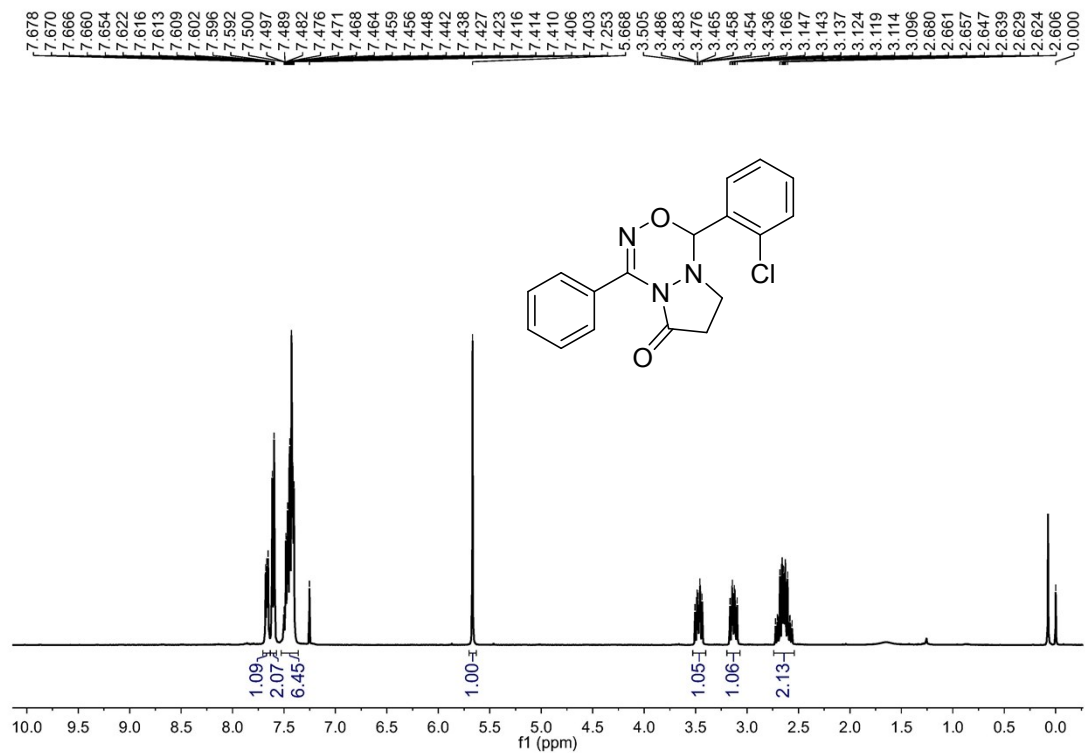

<sup>1</sup>H NMR Spectrum (400 MHz, CDCl<sub>3</sub>) of Compound 3ba

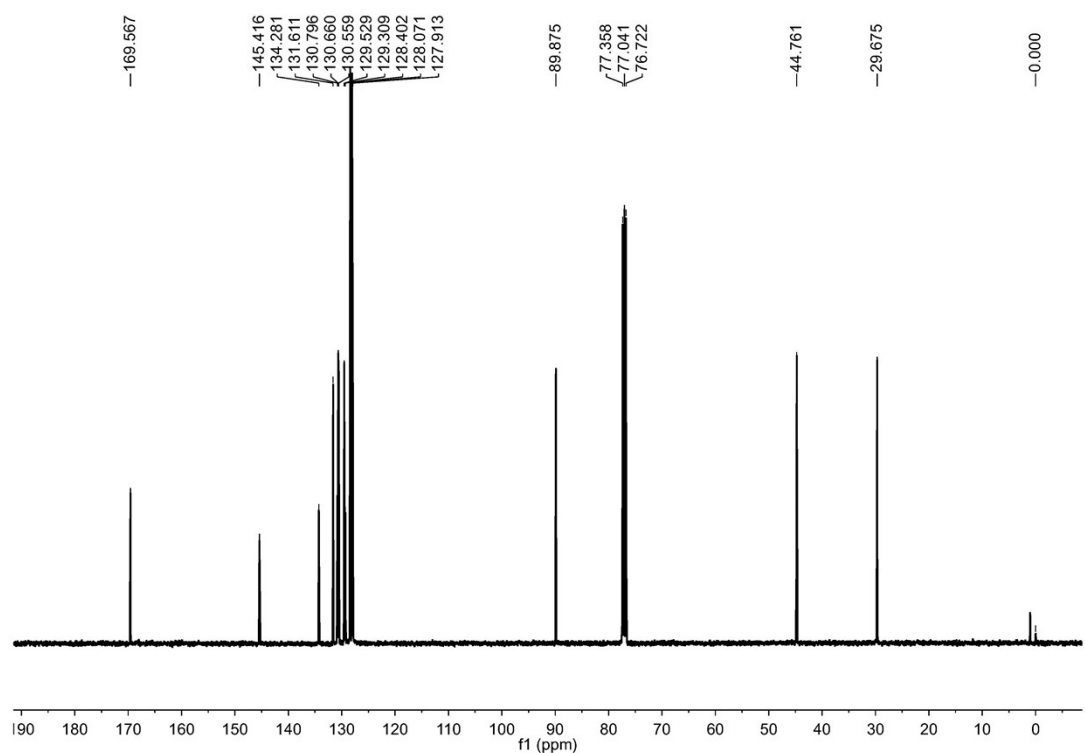

<sup>13</sup>C NMR Spectrum (100 MHz, CDCl<sub>3</sub>) of Compound 3ba

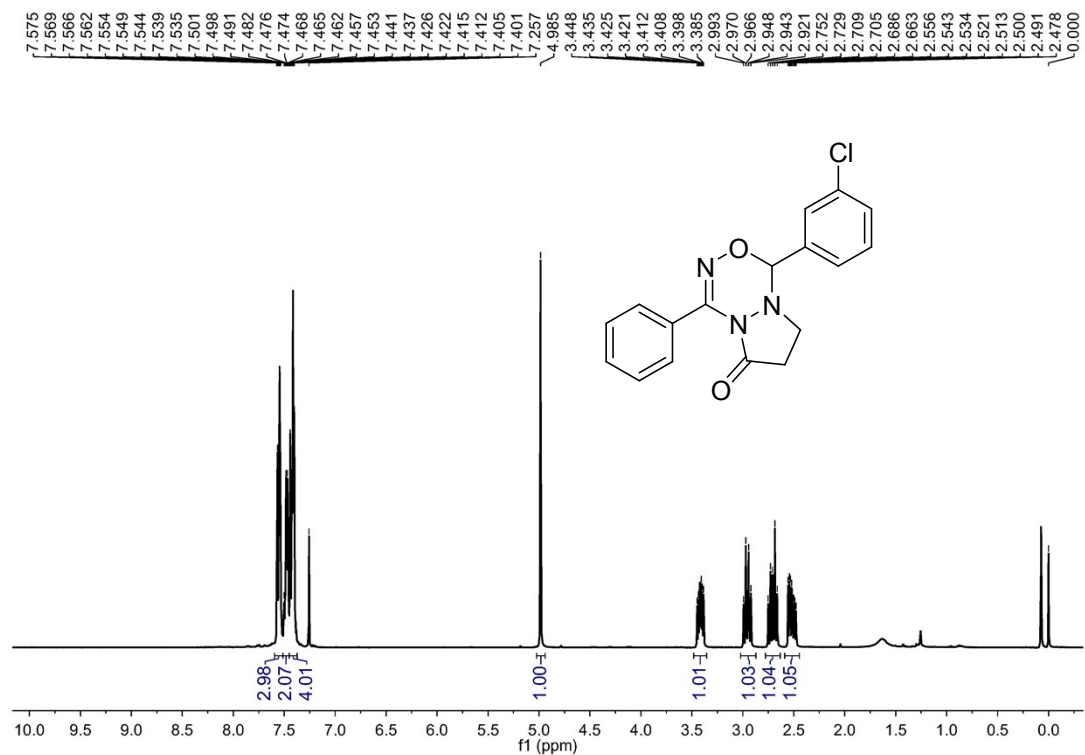

<sup>1</sup>H NMR Spectrum (400 MHz, CDCl<sub>3</sub>) of Compound 3ca

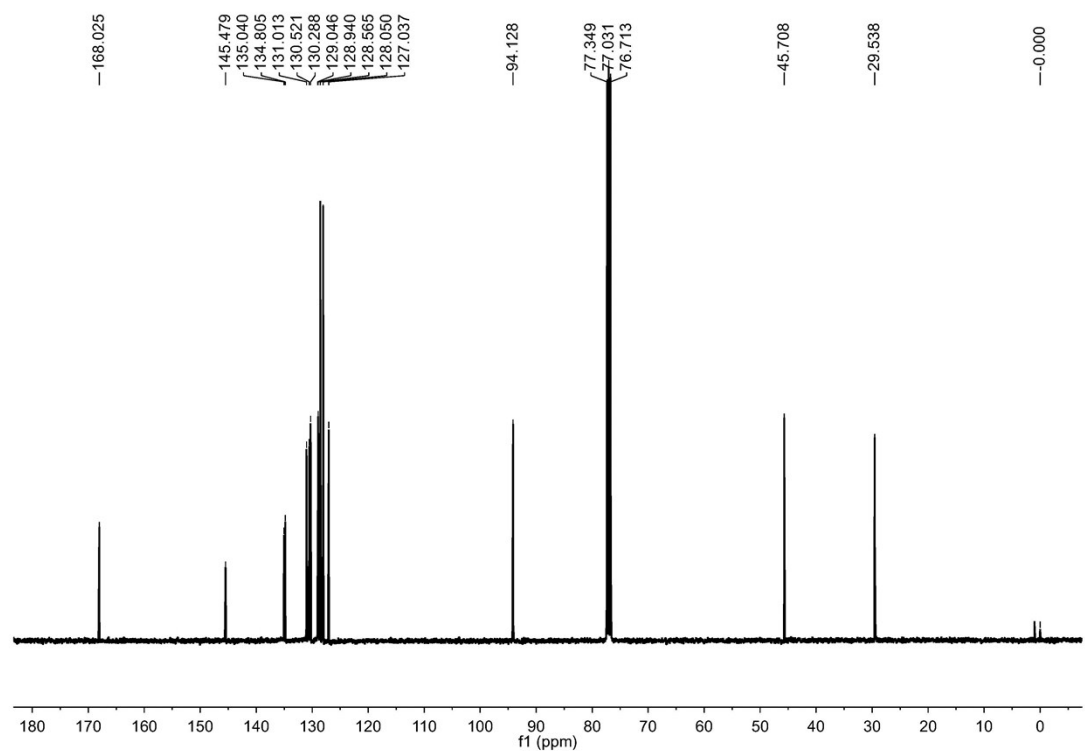

<sup>13</sup>C NMR Spectrum (100 MHz, CDCl<sub>3</sub>) of Compound 3ca

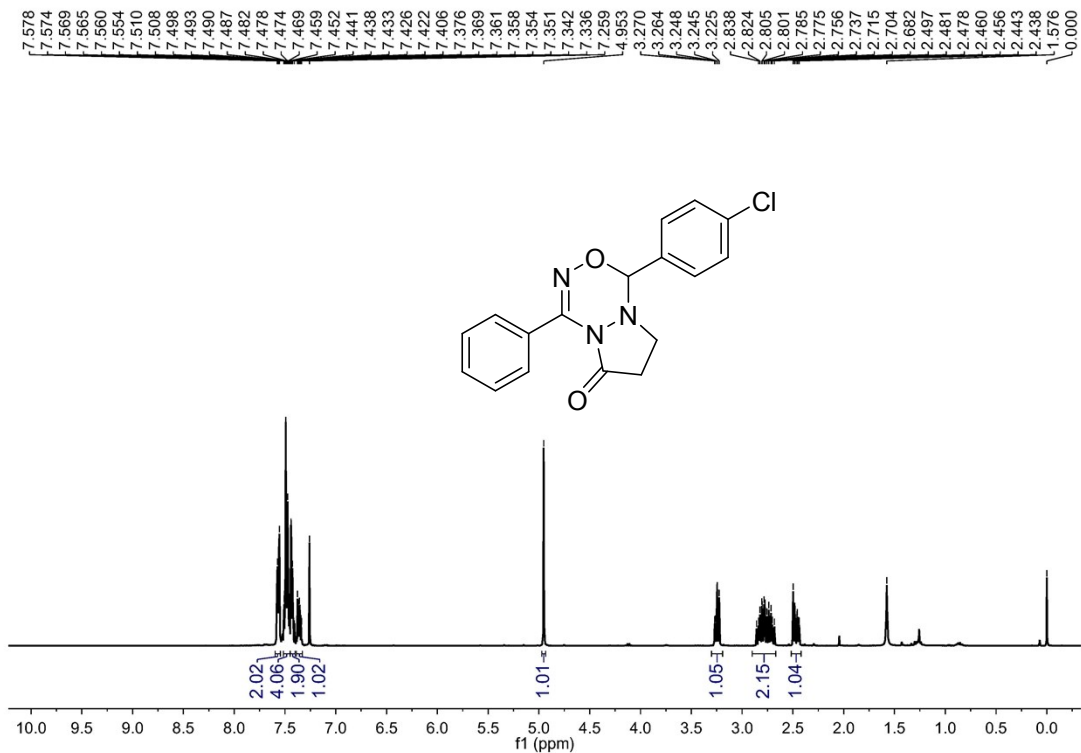

<sup>1</sup>H NMR Spectrum (400 MHz, CDCl<sub>3</sub>) of Compound 3da

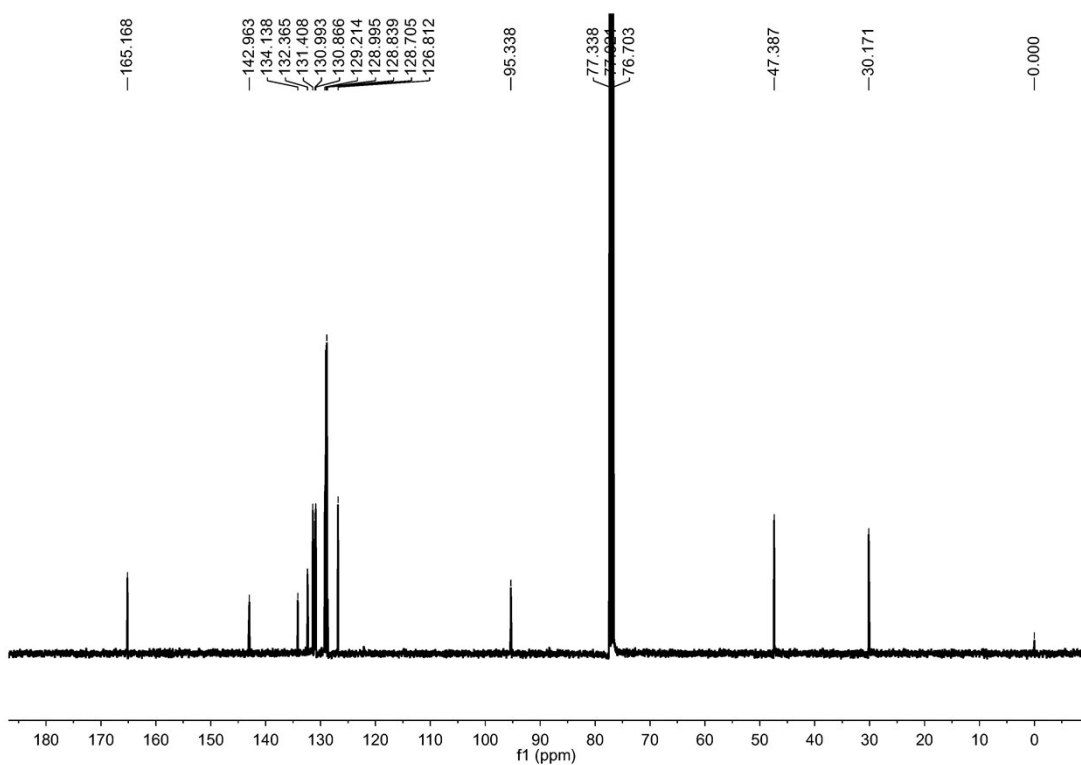

<sup>13</sup>C NMR Spectrum (100 MHz, CDCl<sub>3</sub>) of Compound 3da

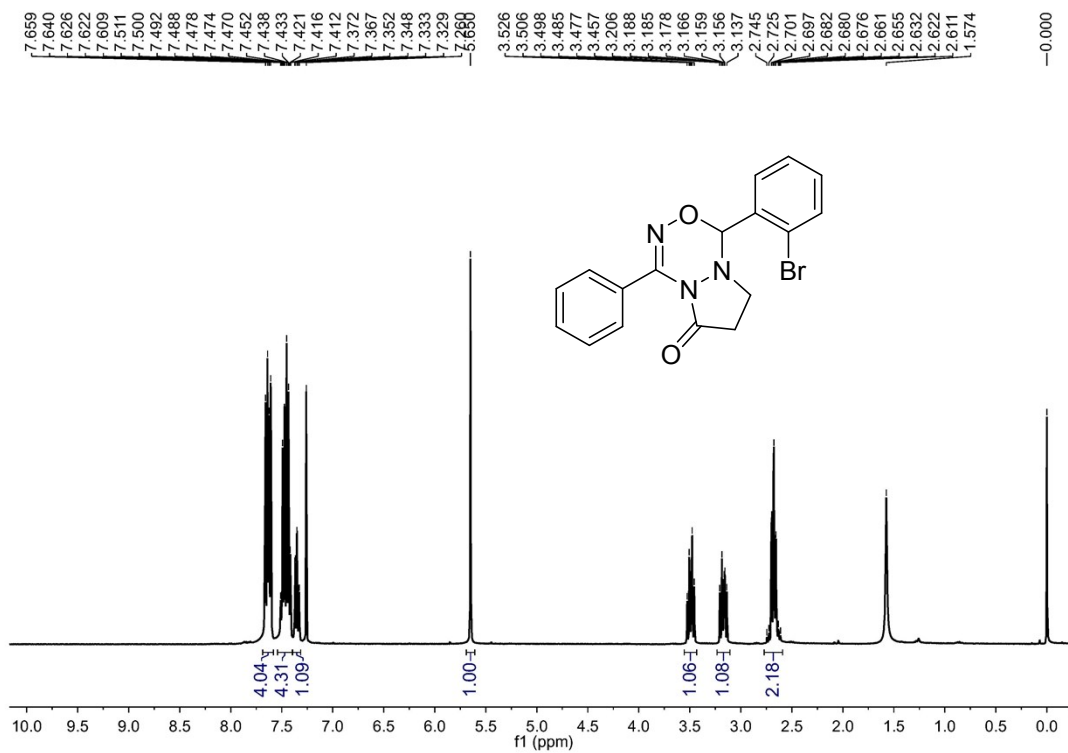

<sup>1</sup>H NMR Spectrum (400 MHz, CDCl<sub>3</sub>) of Compound 3ea

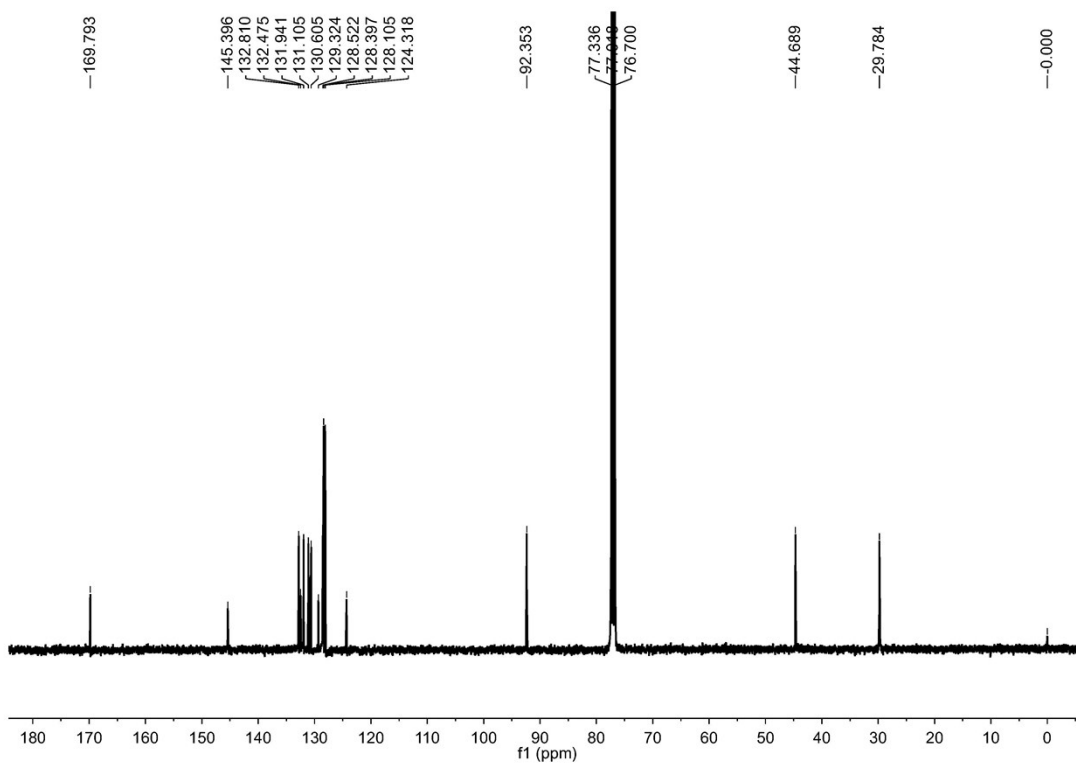

<sup>13</sup>C NMR Spectrum (100 MHz, CDCl<sub>3</sub>) of Compound 3ea

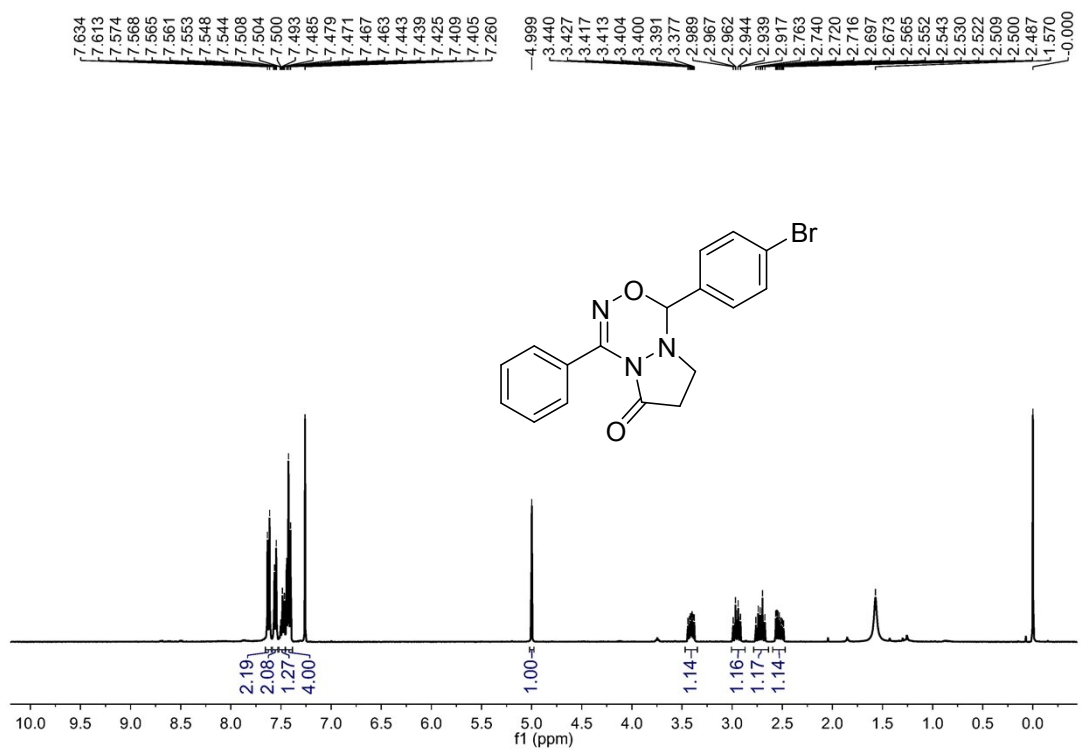

<sup>1</sup>H NMR Spectrum (400 MHz, CDCl<sub>3</sub>) of Compound 3fa

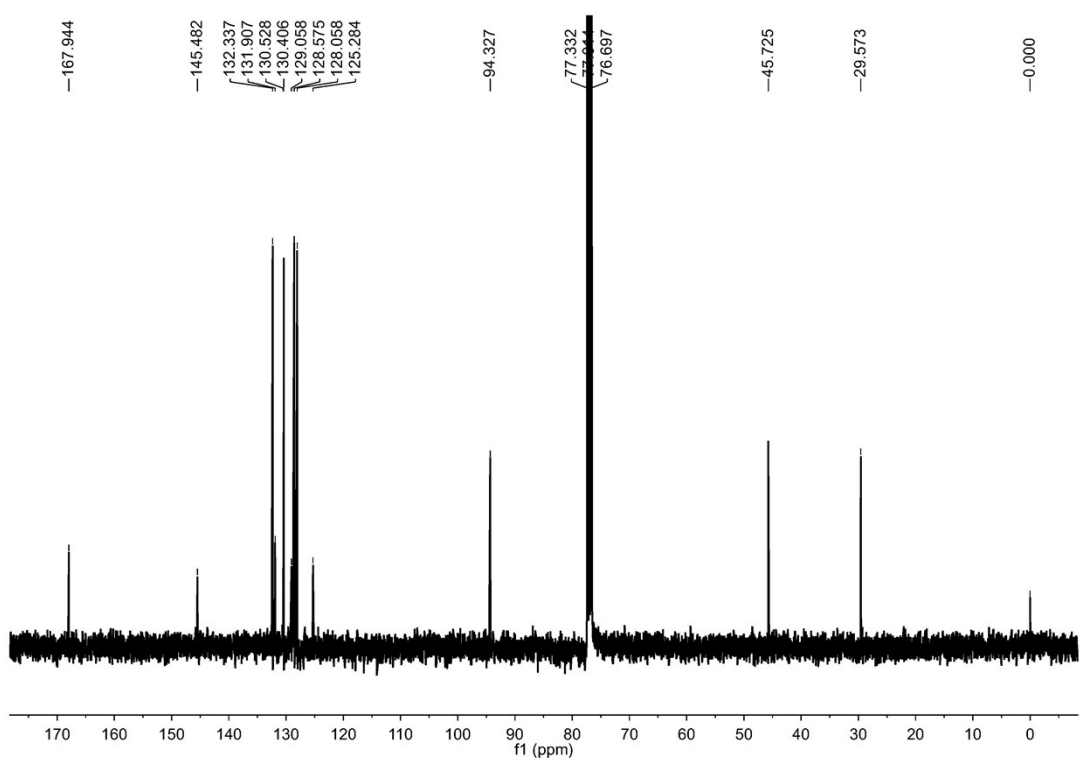

<sup>13</sup>C NMR Spectrum (100 MHz, CDCl<sub>3</sub>) of Compound 3fa

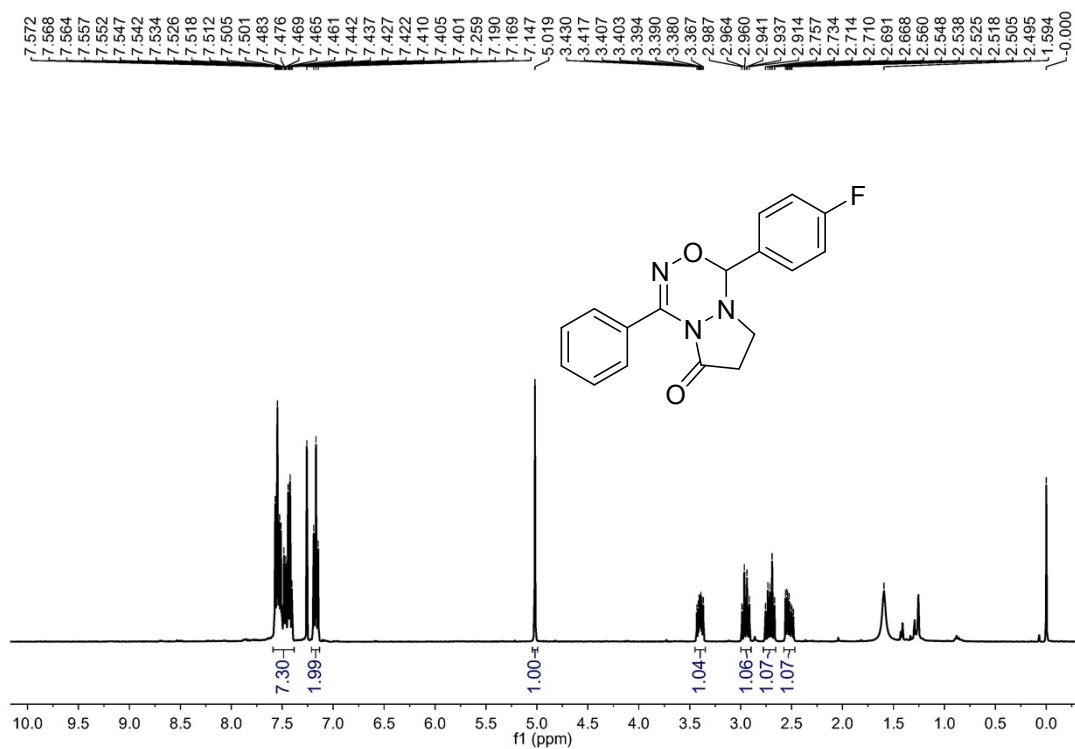

<sup>1</sup>H NMR Spectrum (400 MHz, CDCl<sub>3</sub>) of Compound 3ga

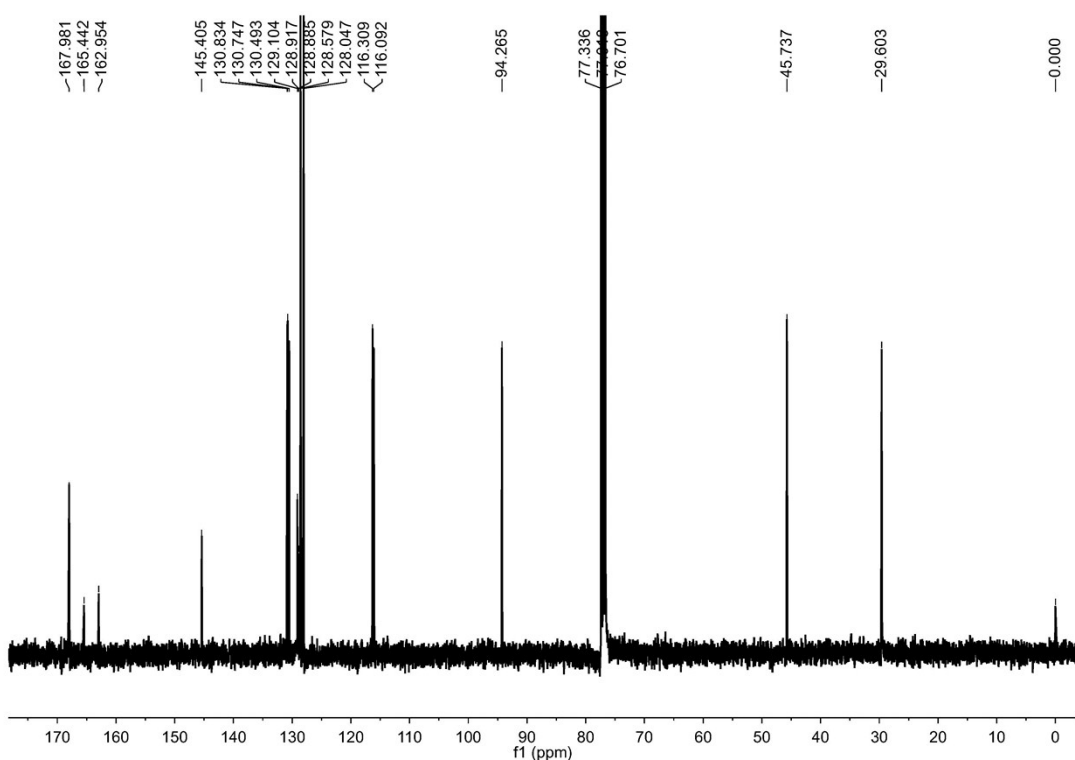

<sup>13</sup>C NMR Spectrum (100 MHz, CDCl<sub>3</sub>) of Compound 3ga



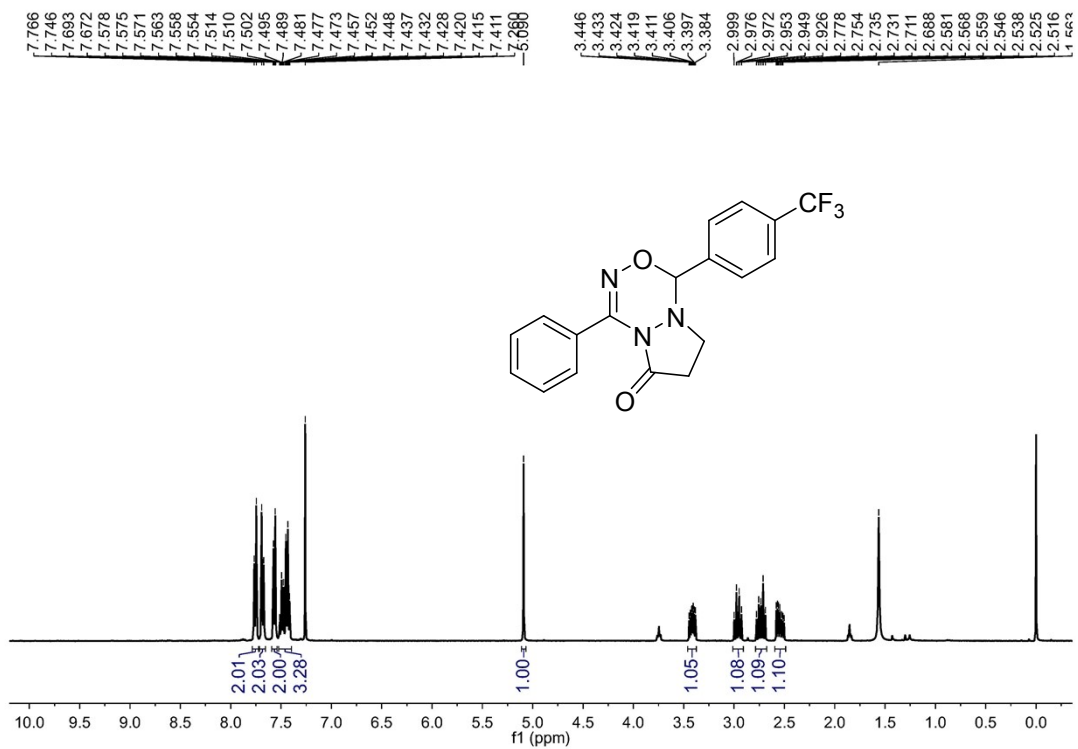

<sup>1</sup>H NMR Spectrum (400 MHz, CDCl<sub>3</sub>) of Compound 3ha

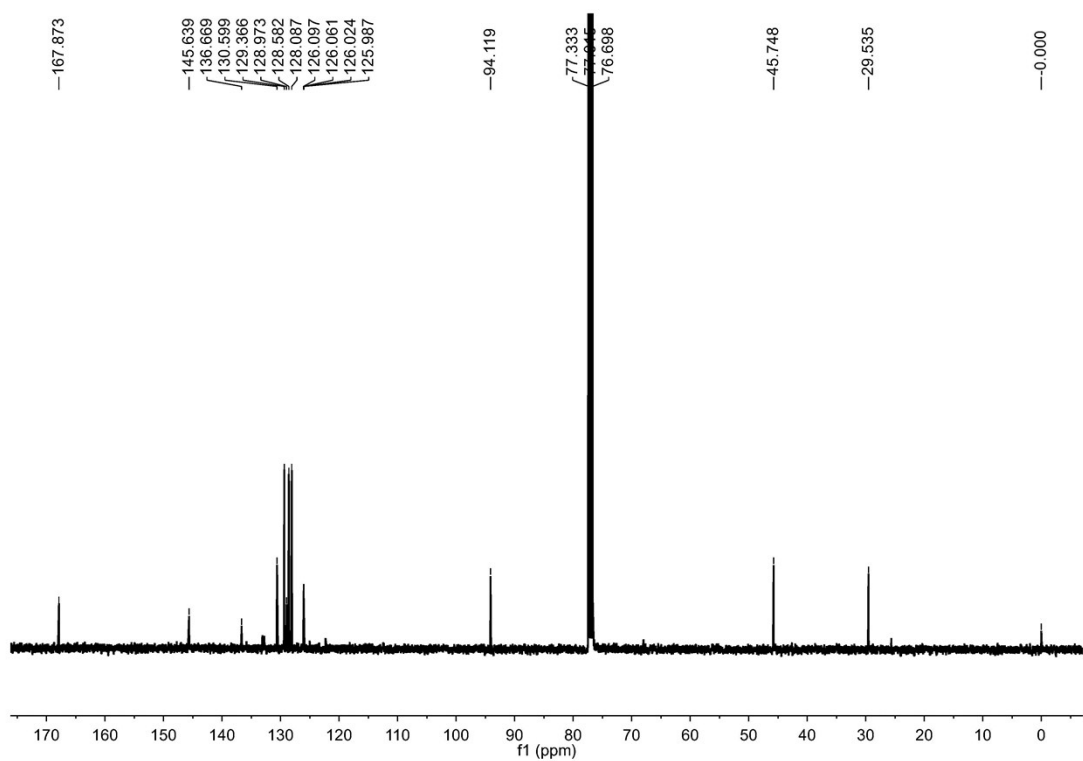

<sup>13</sup>C NMR Spectrum (100 MHz, CDCl<sub>3</sub>) of Compound 3ha

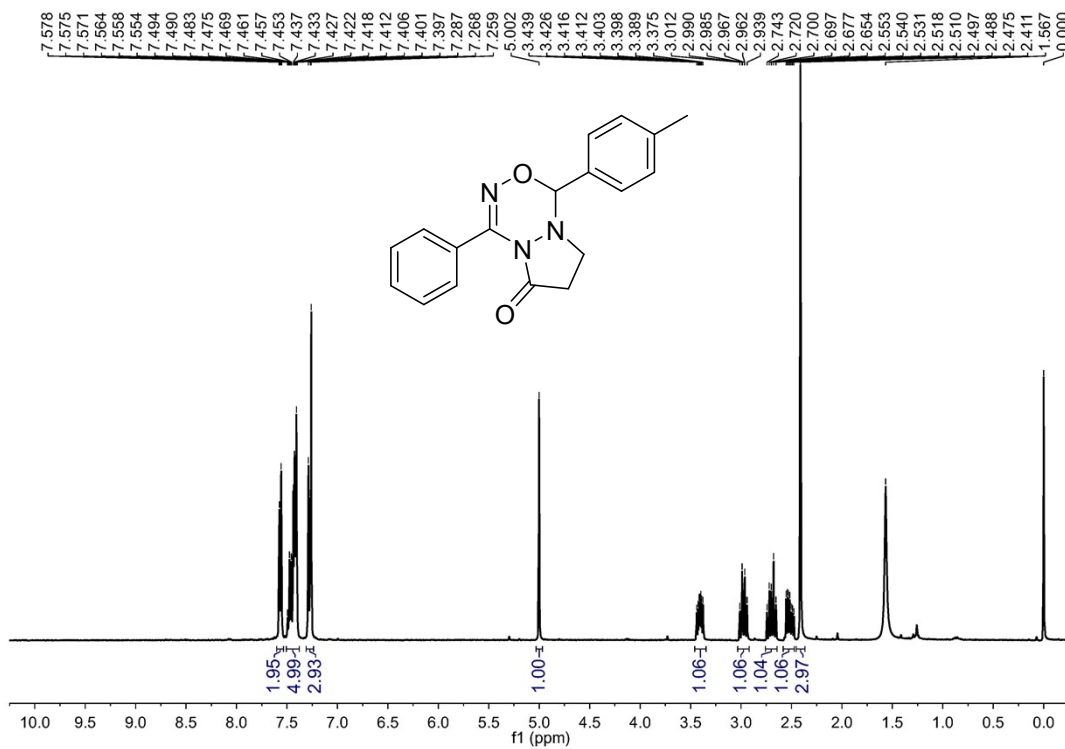

<sup>1</sup>H NMR Spectrum (400 MHz, CDCl<sub>3</sub>) of Compound 3ia

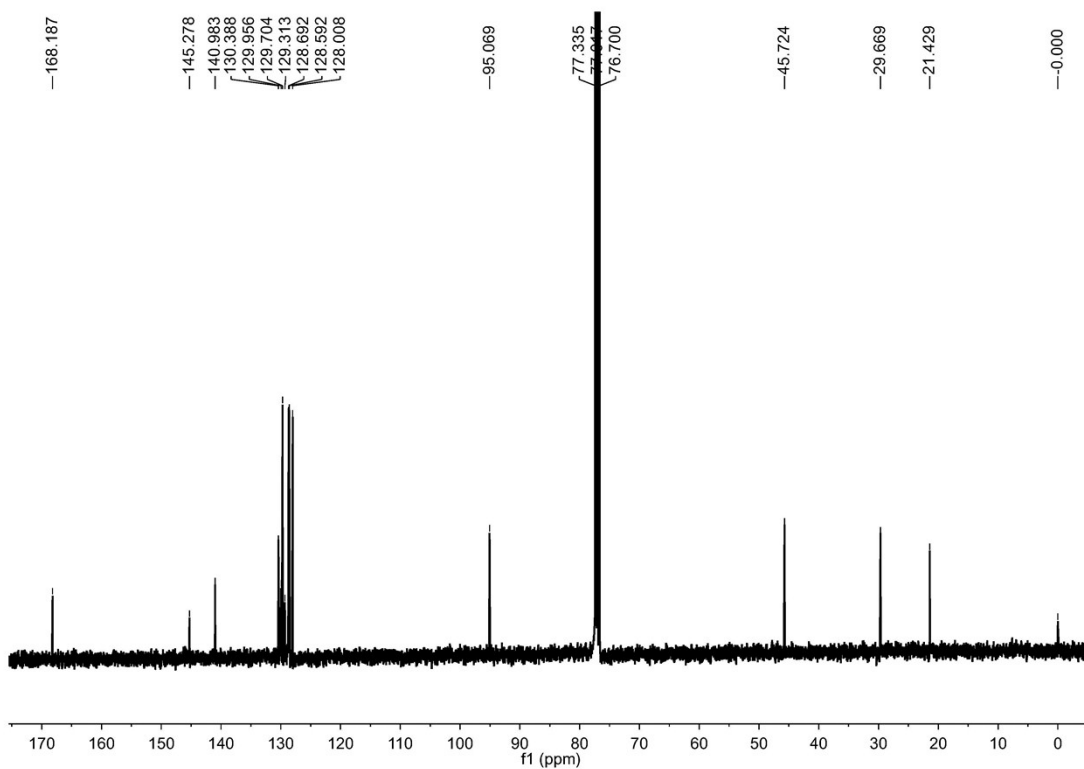

<sup>13</sup>C NMR Spectrum (100 MHz, CDCl<sub>3</sub>) of Compound 3ia

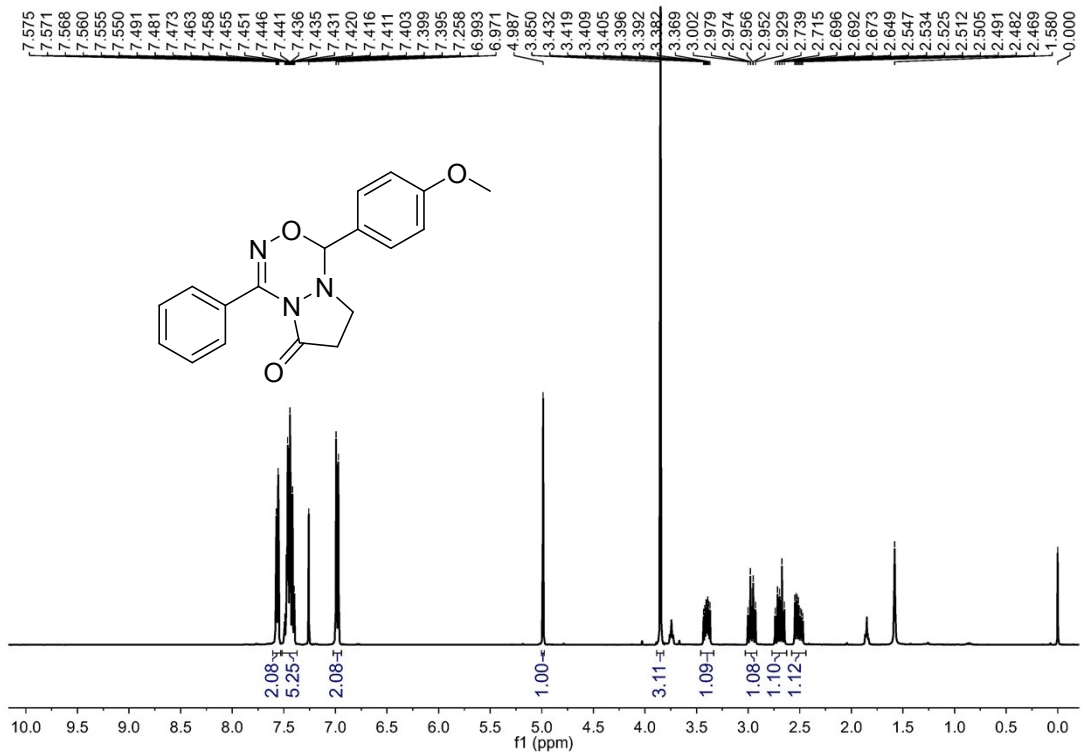

**<sup>1</sup>H NMR Spectrum (400 MHz, CDCl<sub>3</sub>) of Compound 3ja**

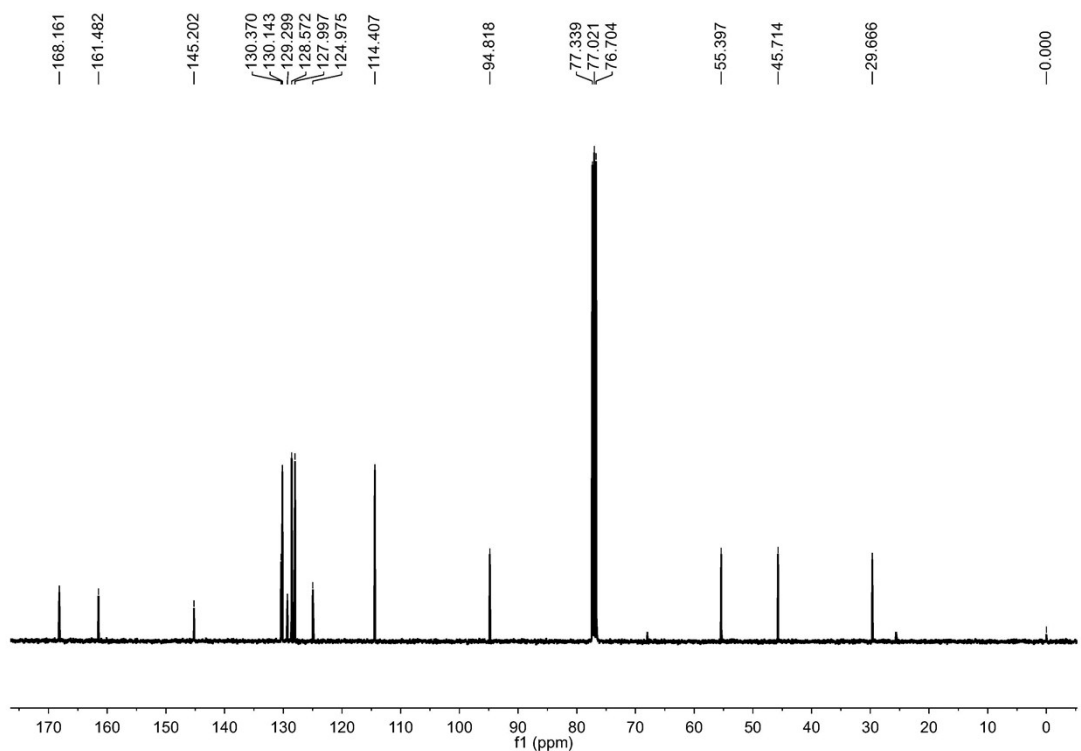

**<sup>13</sup>C NMR Spectrum (100 MHz, CDCl<sub>3</sub>) of Compound 3ja**

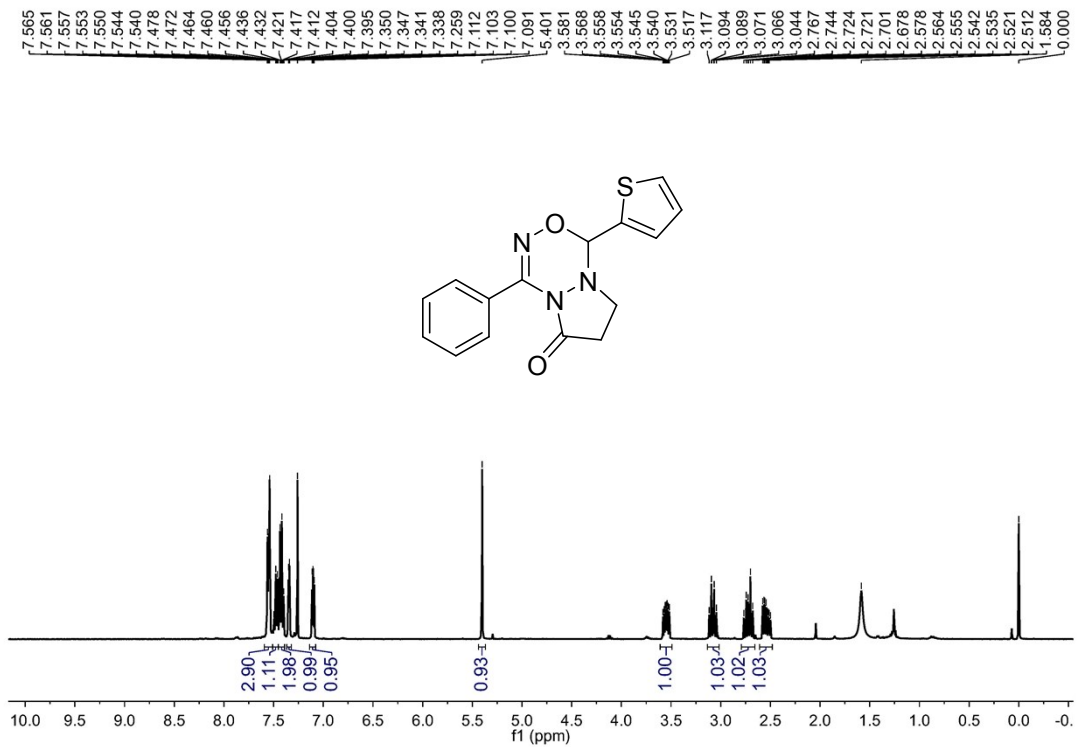

<sup>1</sup>H NMR Spectrum (400 MHz, CDCl<sub>3</sub>) of Compound 3ka

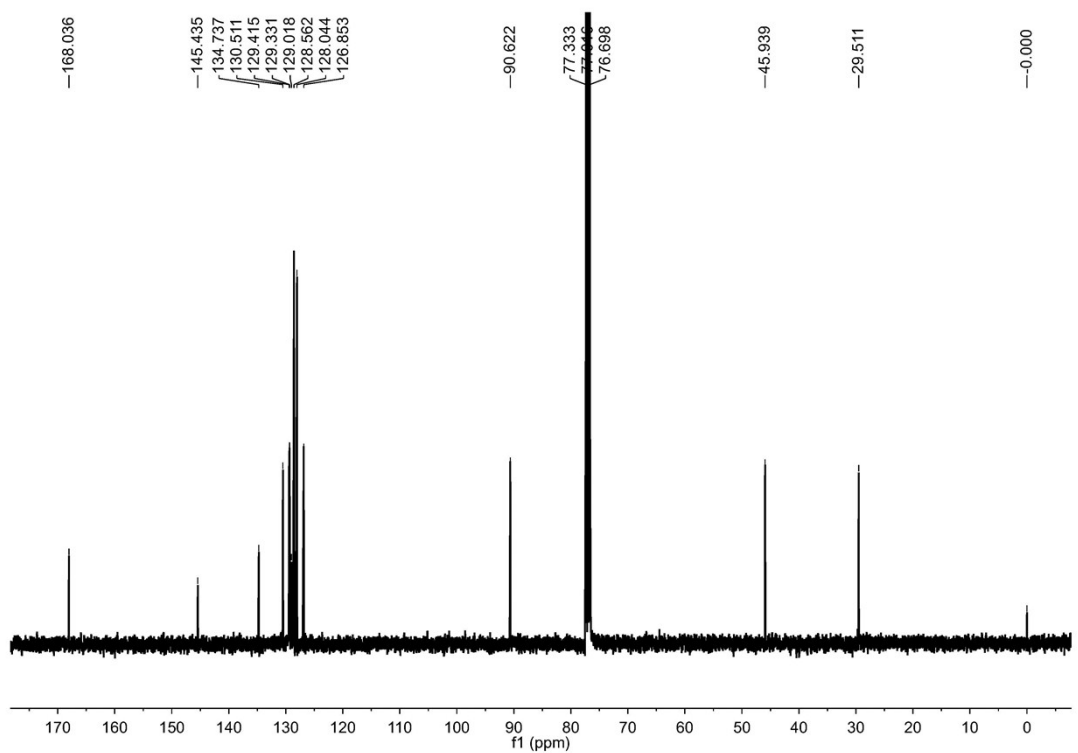

<sup>13</sup>C NMR Spectrum (100 MHz, CDCl<sub>3</sub>) of Compound 3ka

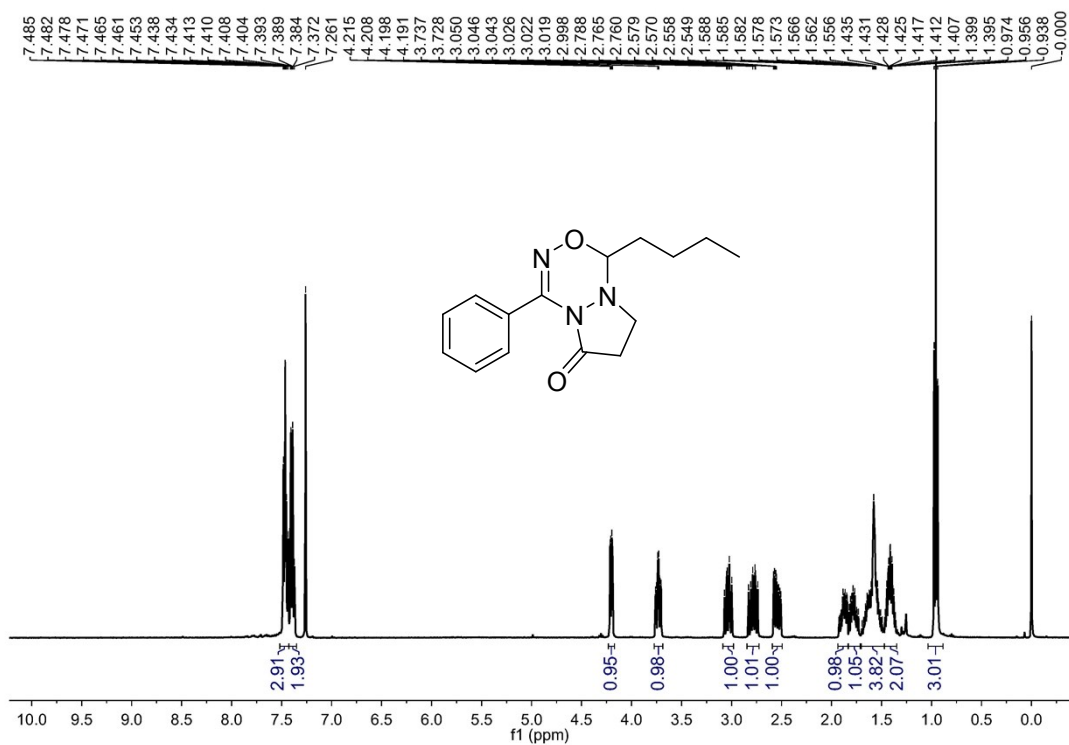

<sup>1</sup>H NMR Spectrum (400 MHz, CDCl<sub>3</sub>) of Compound 3la

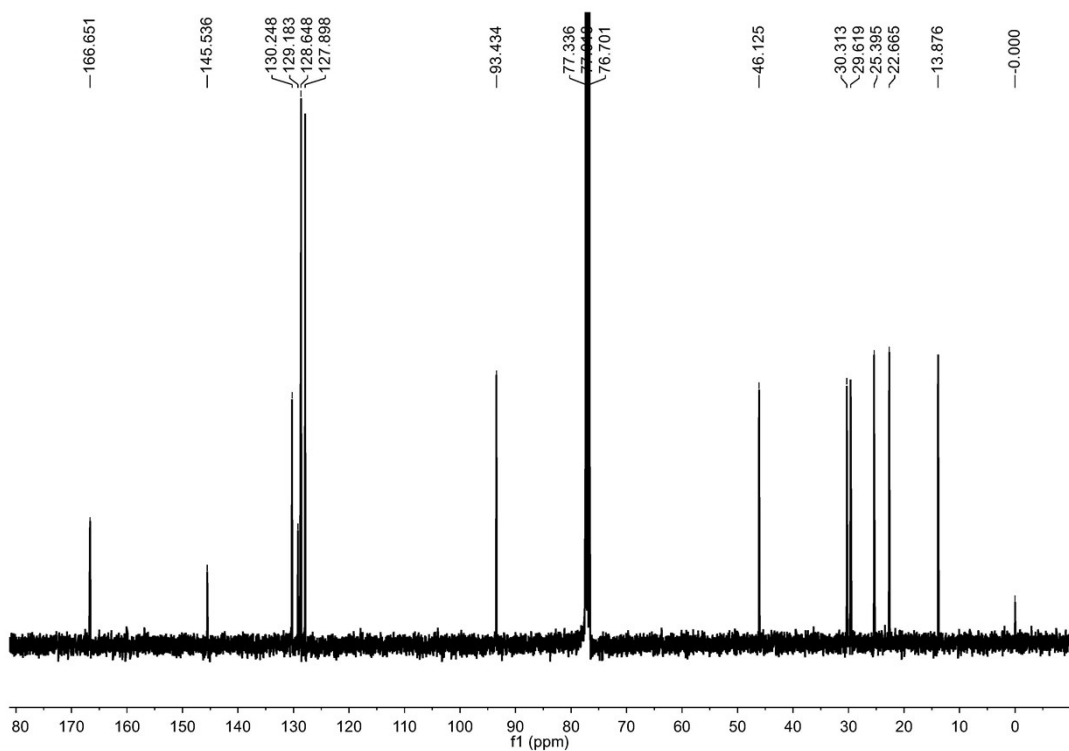

<sup>13</sup>C NMR Spectrum (100 MHz, CDCl<sub>3</sub>) of Compound 3la

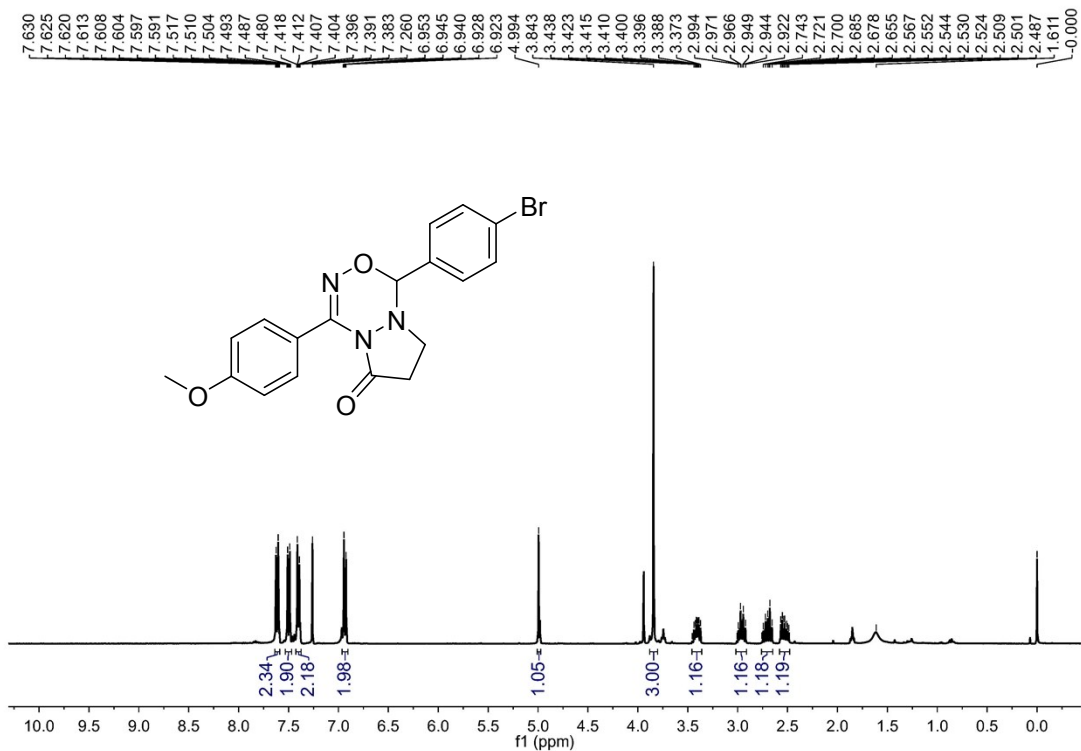

**<sup>1</sup>H NMR Spectrum (400 MHz, CDCl<sub>3</sub>) of Compound 3fe**

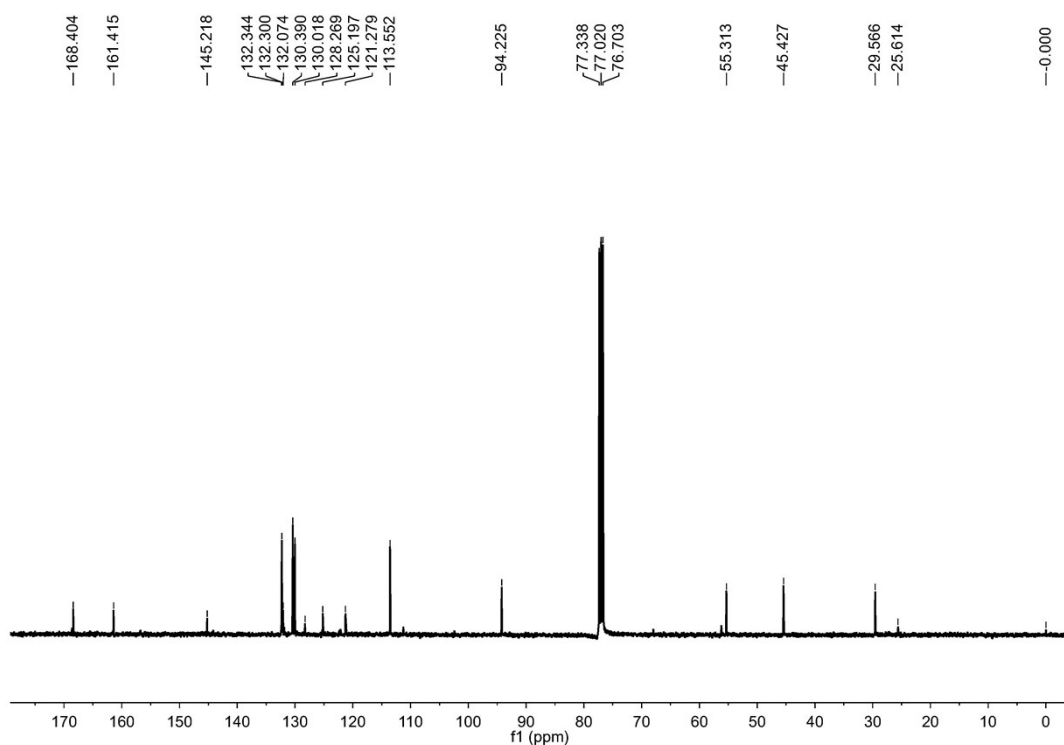

**<sup>13</sup>C NMR Spectrum (100 MHz, CDCl<sub>3</sub>) of Compound 3fe**

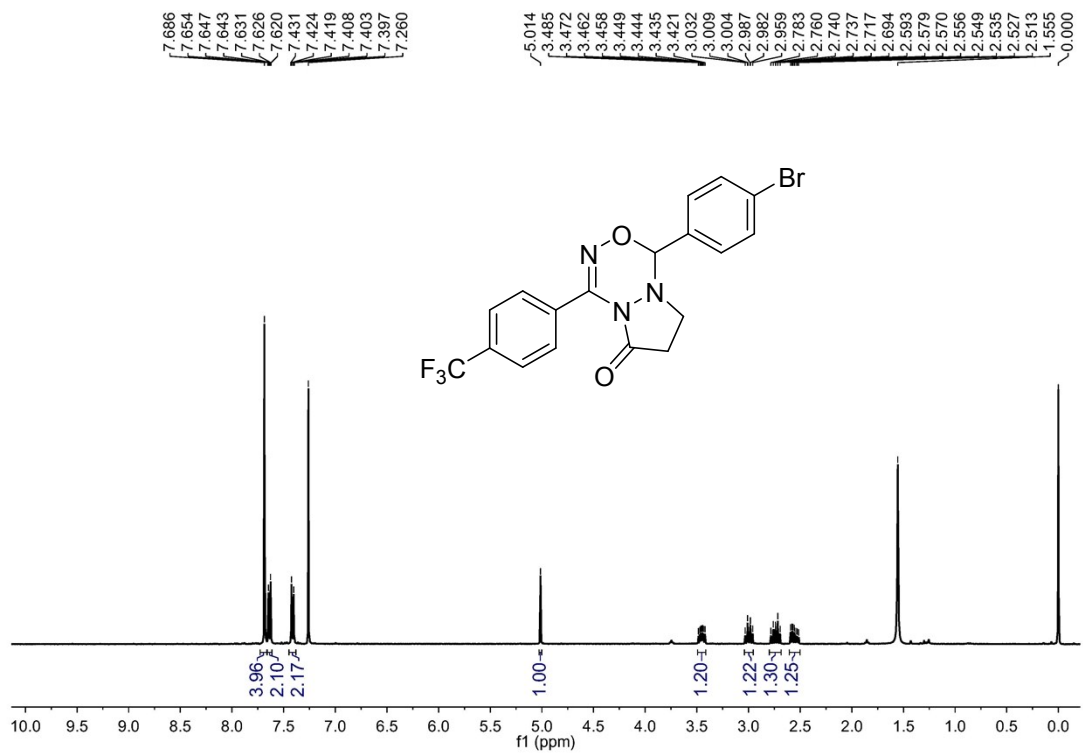

<sup>1</sup>H NMR Spectrum (400 MHz, CDCl<sub>3</sub>) of Compound 3fk

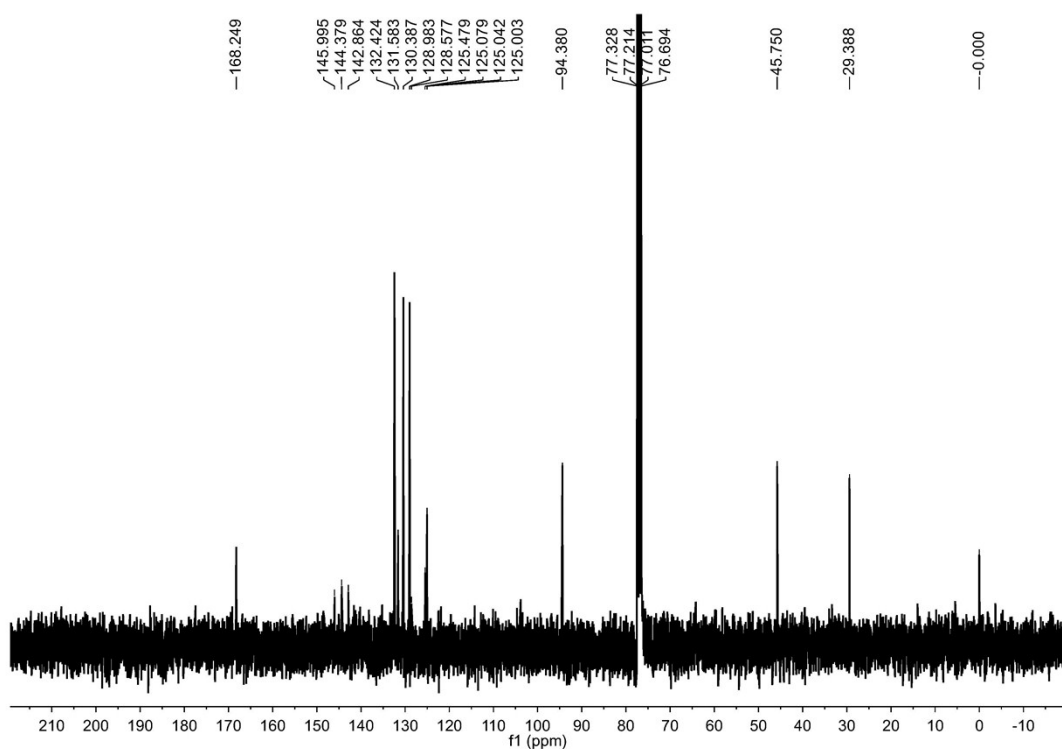

<sup>13</sup>C NMR Spectrum (100 MHz, CDCl<sub>3</sub>) of Compound 3fk

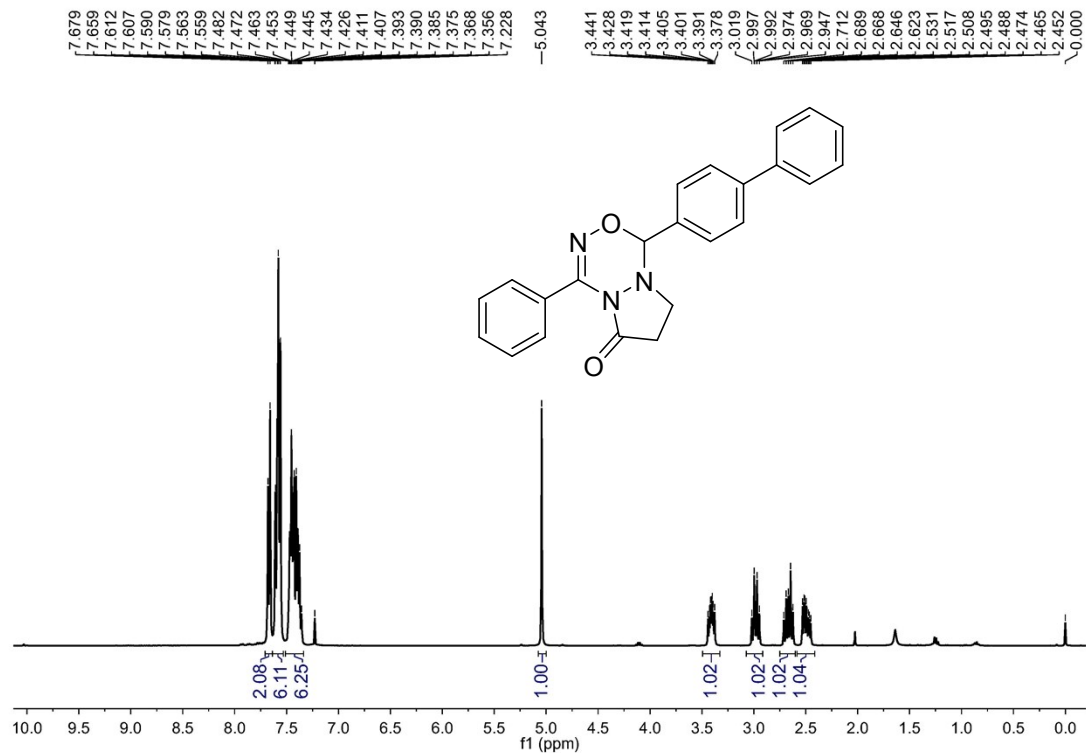

<sup>13</sup>C NMR Spectrum (100 MHz, CDCl<sub>3</sub>) of Compound 4

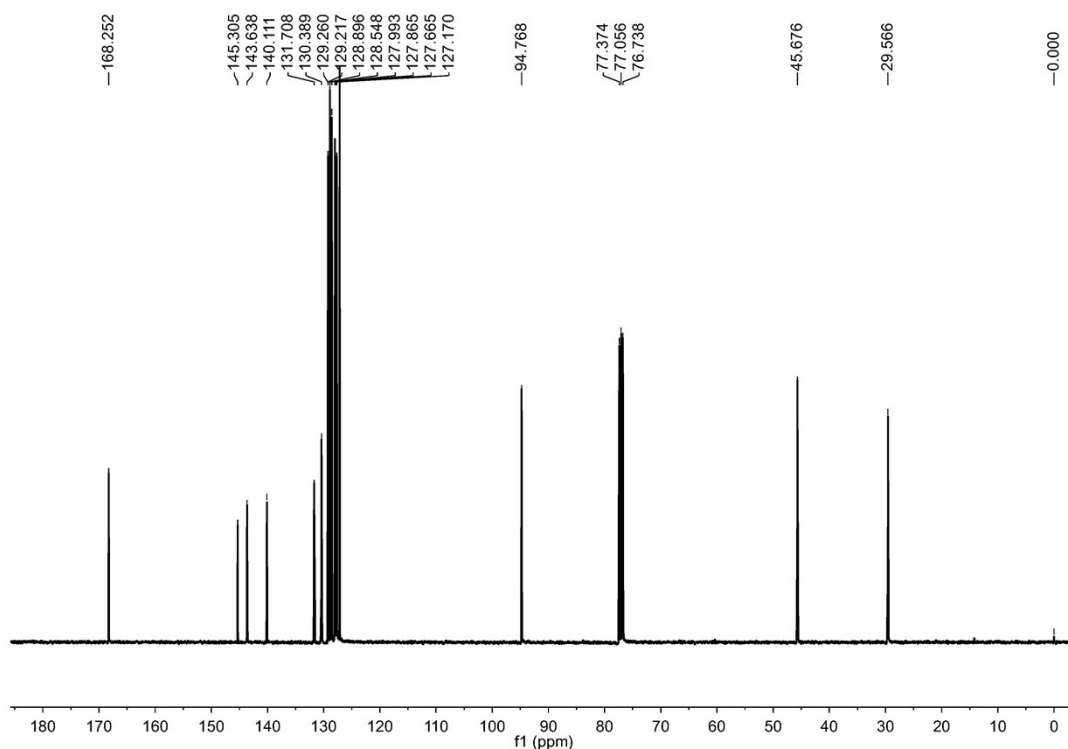

<sup>1</sup>H NMR Spectrum (400 MHz, CDCl<sub>3</sub>) of Compound 4



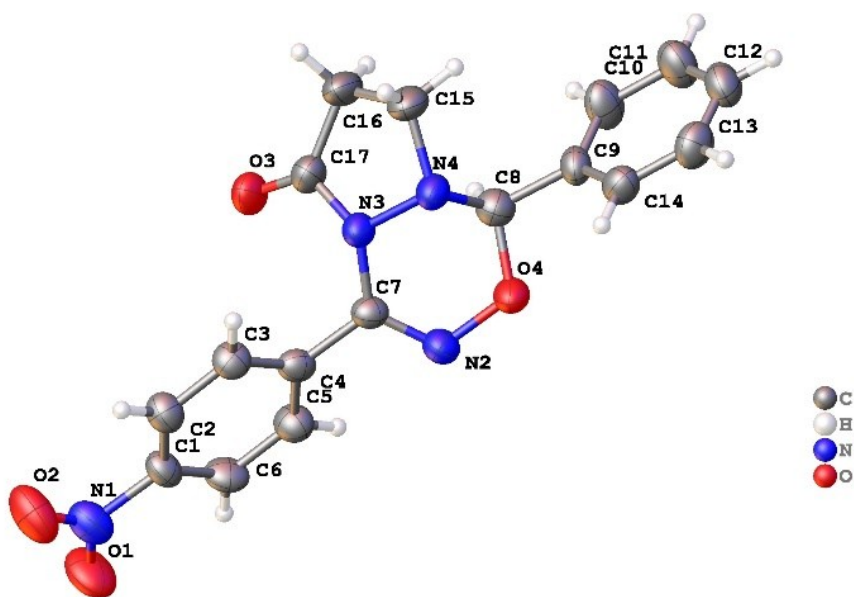

**Figure S1.** Crystal Structure of **3I** (50% probability level for the thermal ellipsoids).

**Table S1.** Crystal Data for Compound **31**

| Formula                                             | C <sub>17</sub> H <sub>14</sub> N <sub>4</sub> O <sub>4</sub>                                                                                                                 |
|-----------------------------------------------------|-------------------------------------------------------------------------------------------------------------------------------------------------------------------------------|
| Formula weight                                      | 338.32                                                                                                                                                                        |
| Temperature                                         | 293(2) K                                                                                                                                                                      |
| Wavelength                                          | 0.71073 Å                                                                                                                                                                     |
| Crystal system                                      | Orthorhombic                                                                                                                                                                  |
| Space group                                         | <i>P b c a</i>                                                                                                                                                                |
| Unit cell dimensions                                | $a = 12.2898 (13) \text{ \AA}, \alpha = 90 \text{ deg.}$<br>$b = 11.4074 (13) \text{ \AA}, \beta = 90 \text{ deg.}$<br>$c = 22.636 (3) \text{ \AA}, \gamma = 90 \text{ deg.}$ |
| Volume                                              | 3173.5 (6) Å <sup>3</sup>                                                                                                                                                     |
| <i>Z</i>                                            | 8                                                                                                                                                                             |
| Density (calculated)                                | 1.416 Mg / m <sup>3</sup>                                                                                                                                                     |
| Absorption coefficient                              | 0.104 mm <sup>-1</sup>                                                                                                                                                        |
| <i>F</i> (000)                                      | 1408                                                                                                                                                                          |
| Crystal                                             | 0.25 x 0.21 x 0.12 mm                                                                                                                                                         |
| Theta range for data collection                     | 3.572 to 26.997 deg                                                                                                                                                           |
| Limiting indices                                    | -15<= <i>h</i> <=9, -14<= <i>k</i> <=8, -17<= <i>l</i> <=28                                                                                                                   |
| Reflections collected                               | 9906                                                                                                                                                                          |
| Independent reflections                             | 3429 [R(int) = 0.0849]                                                                                                                                                        |
| Data / restraints / parameters                      | 3429 / 12 / 226                                                                                                                                                               |
| Goodness-of-fit on <i>F</i> <sup>2</sup>            | 0.924                                                                                                                                                                         |
| Final <i>R</i> indices [ <i>I</i> > 2σ( <i>I</i> )] | <i>R</i> <sub>1</sub> = 0.0578, <i>wR</i> <sub>2</sub> = 0.0742                                                                                                               |
| <i>R</i> indices (all data)                         | <i>R</i> <sub>1</sub> = 0.1541, <i>wR</i> <sub>2</sub> = 0.0984                                                                                                               |
| Largest diff. peak and hole                         | 0.160 and -0.210 e. Å <sup>-3</sup>                                                                                                                                           |
